# Supplementary material for: An Hsp90 co-chaperone protein in yeast is functionally replaced by site-specific posttranslational modification in humans
Source: PubMed Central journal article supplement (PMC5458067; doi:10.1038/ncomms15328), 2017-05-24
Supplement: ncomms15328-s1.pdf [file ncomms15328-s1.pdf]

## Supplementary Information

### Supplementary Figures

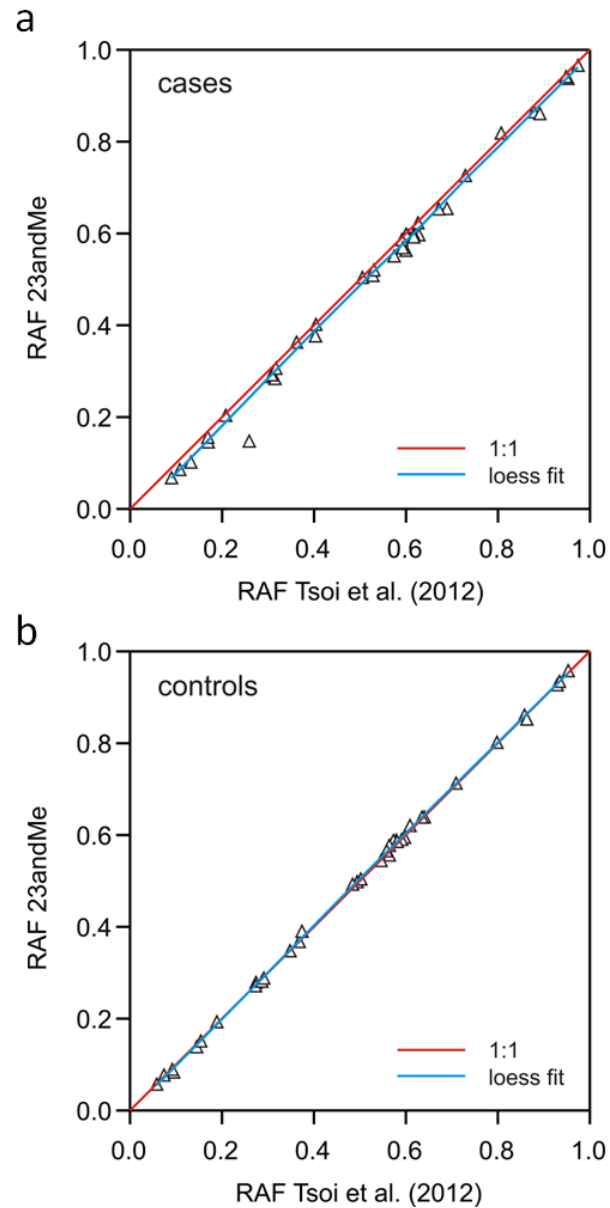

**Supplementary Figure 1. Risk allele frequencies (RAFs) for the known psoriasis loci estimated in the 23andMe cohort versus those estimated from our previous study (Tsoi et al., 2012. *Nat Genet*) in cases (a) and controls (b). The loess fit is shown in blue, and the expected 1:1 relationship is shown in red.**

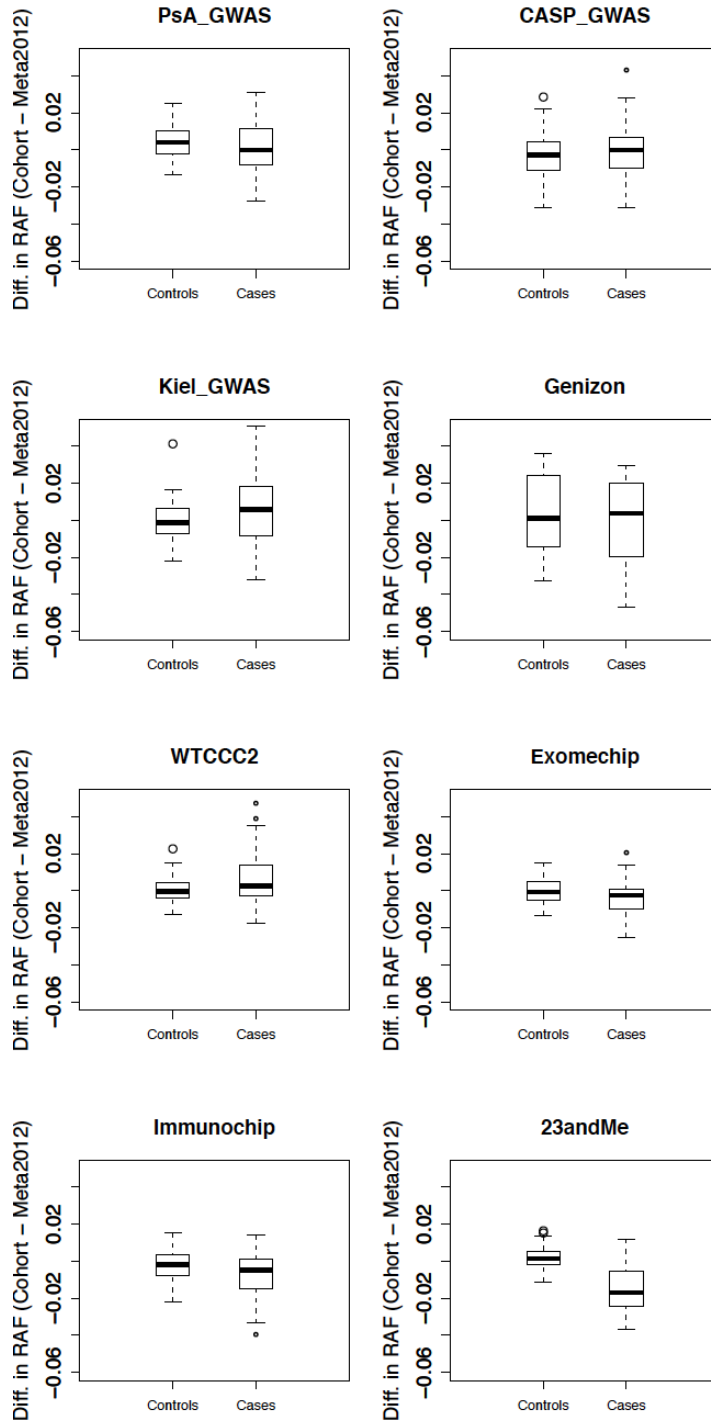

**Supplementary Figure 2. Boxplots showing differences in risk allele frequencies (RAFs) estimated in the different cohorts versus those estimated in the meta-analysis of Tsoi et al, 2012. *Nat Genet*.** The RAFs estimated from the meta-analysis were used as they represent the results of the previous largest genetic study of psoriasis in European-origin individuals.

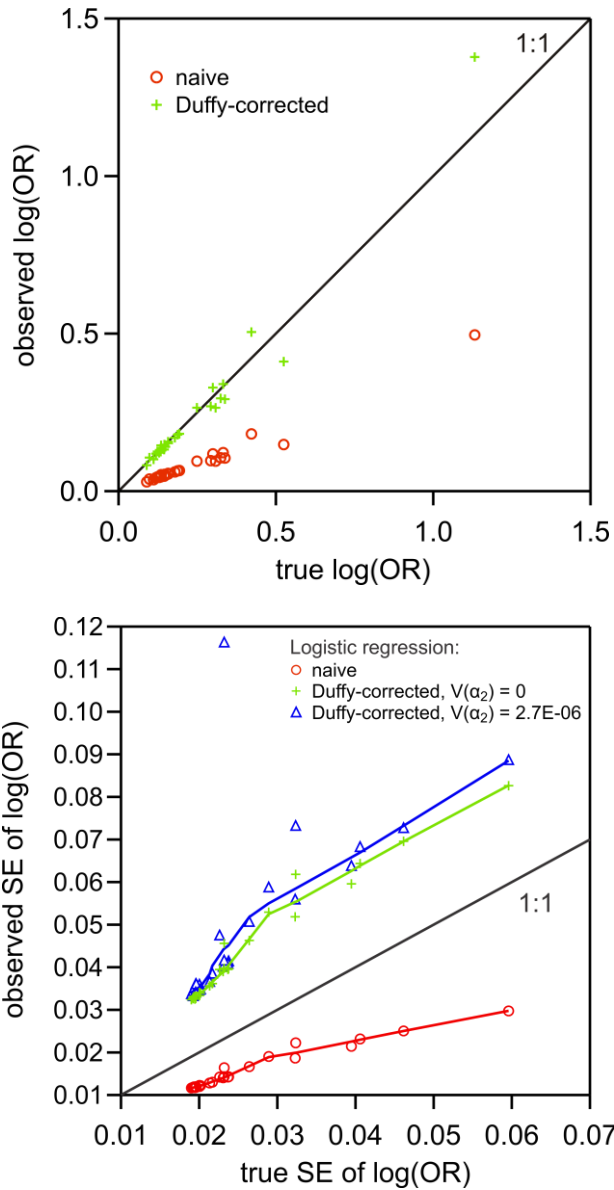

**Supplementary Figure 3. Duffy-adjusted ORs and standard errors.** (Top) Using ORs estimated from independent cohorts for known loci, the Duffy adjustment could correct the downward bias of ORs estimator in the 23andMe cohort. The results were based on simulation of misclassified data described in Materials and methods. (Bottom) Duffy-adjusted standard errors of the  $\ln(\text{OR})$ , illustrating that correction for misclassification increases the standard error (blue and green vs. red), and the increase is greater when uncertainty for the estimator of the misclassification parameter  $\alpha_2$  is accounted for (blue vs. green).

**a**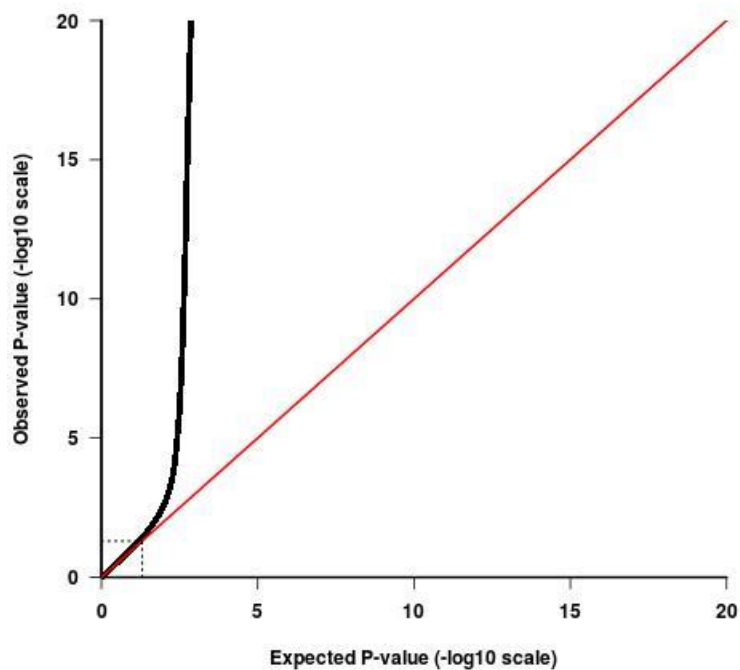**b**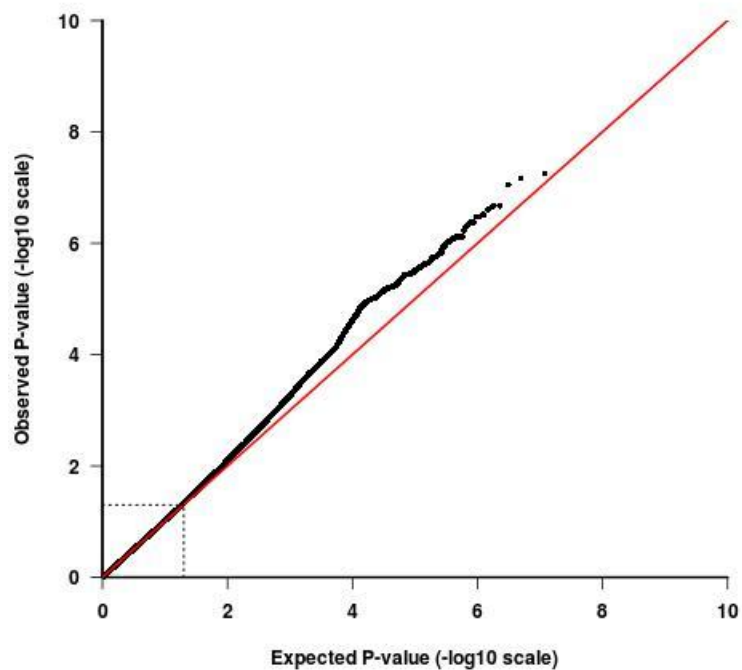

**Supplementary Figure 4. QQ plots for the meta-analysis.** a) all markers; b) markers outside previously known psoriasis susceptibility regions.

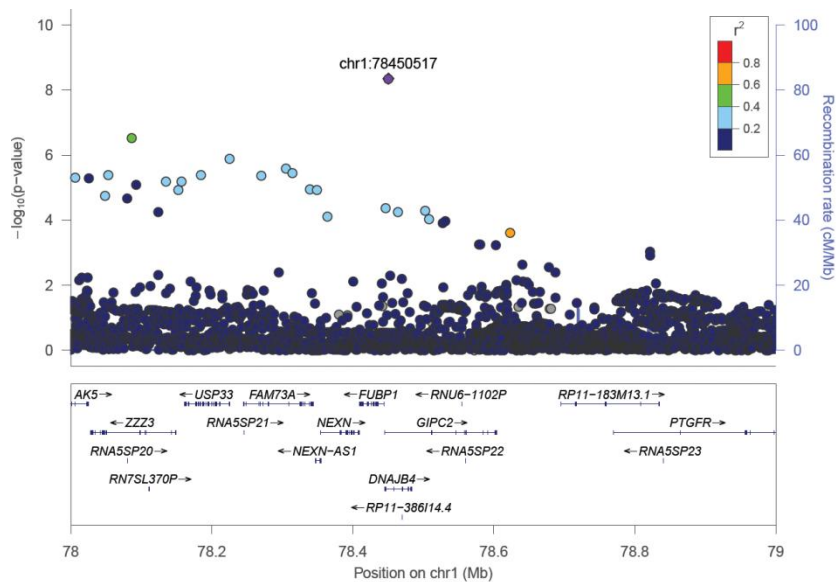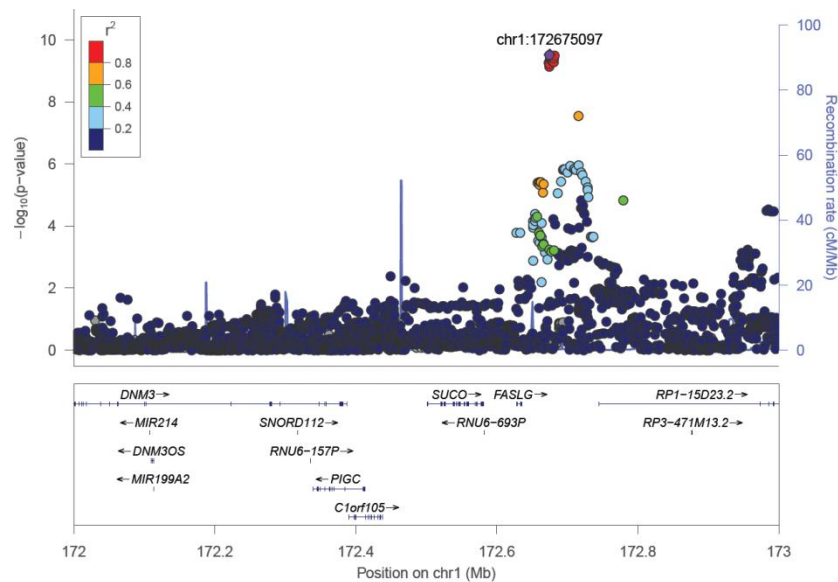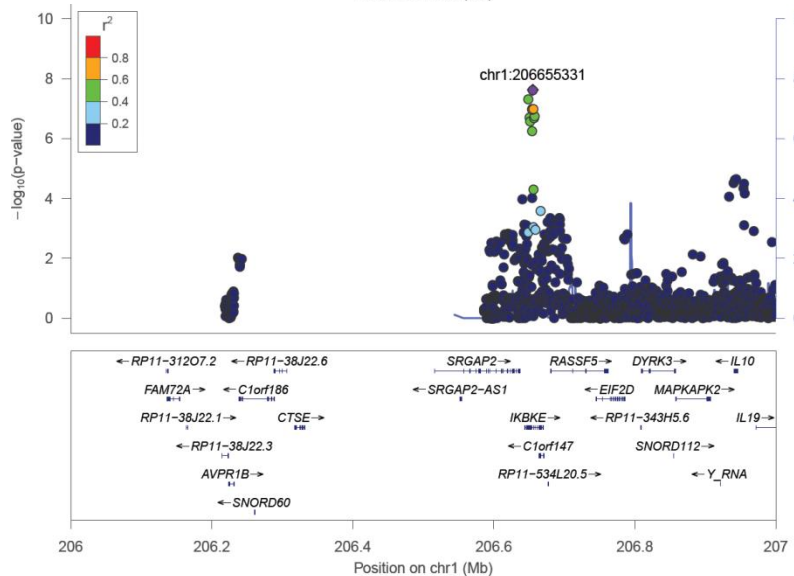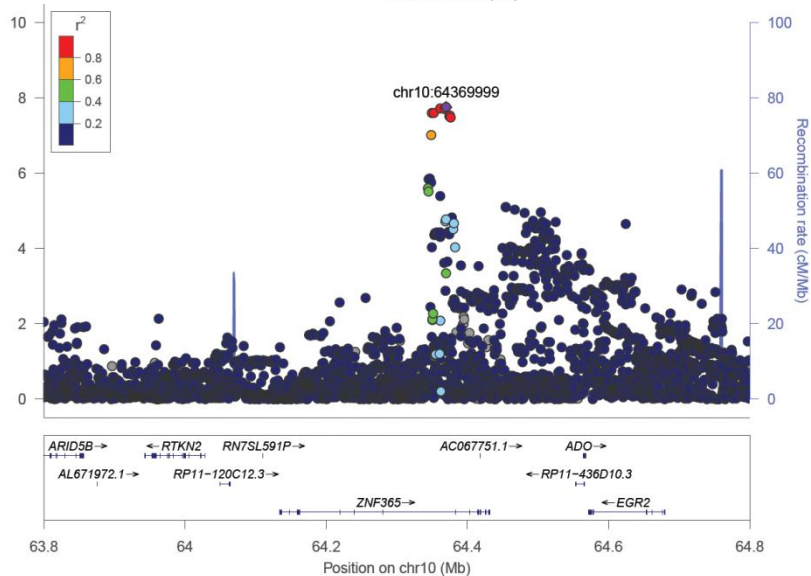

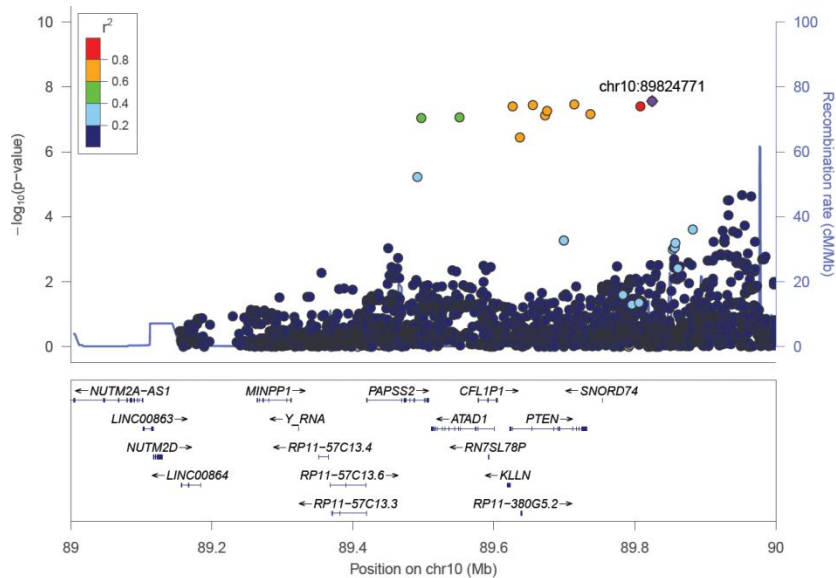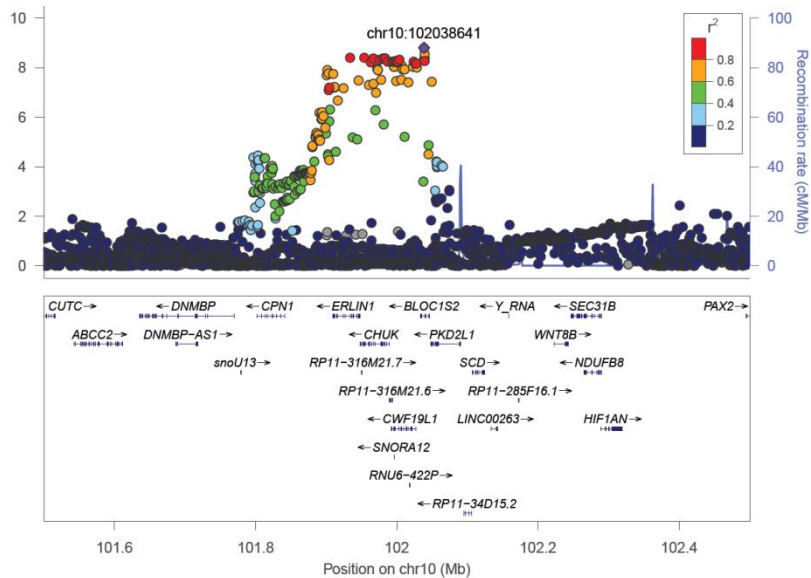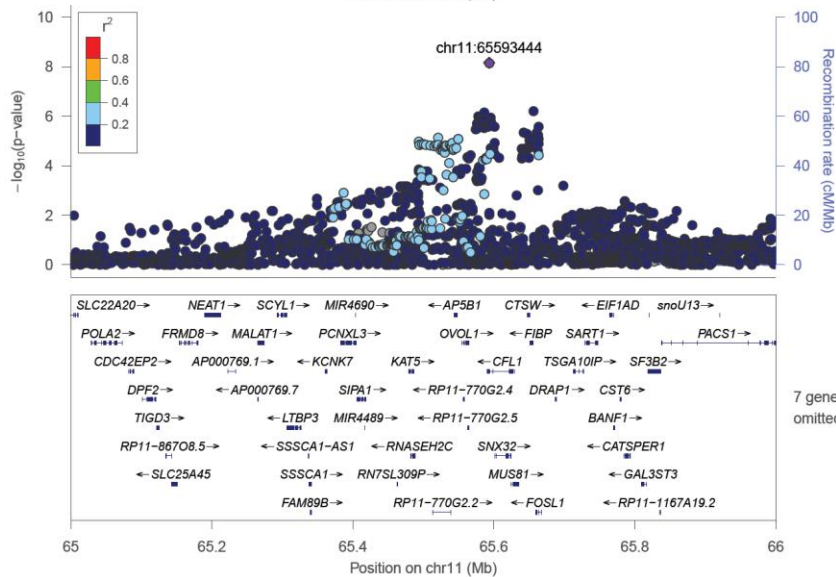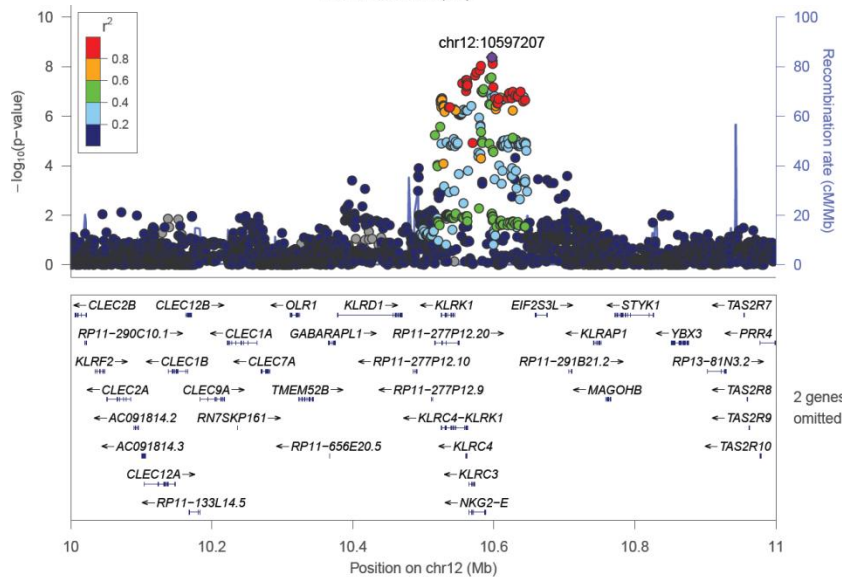

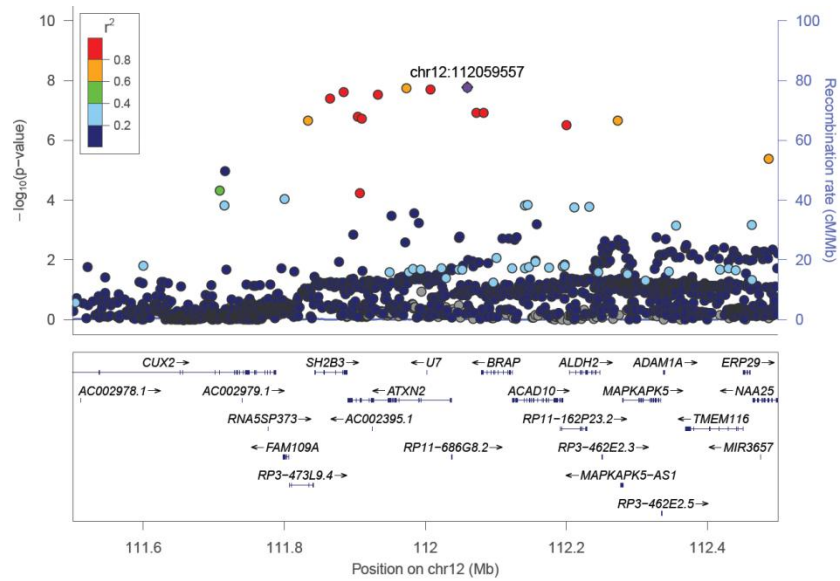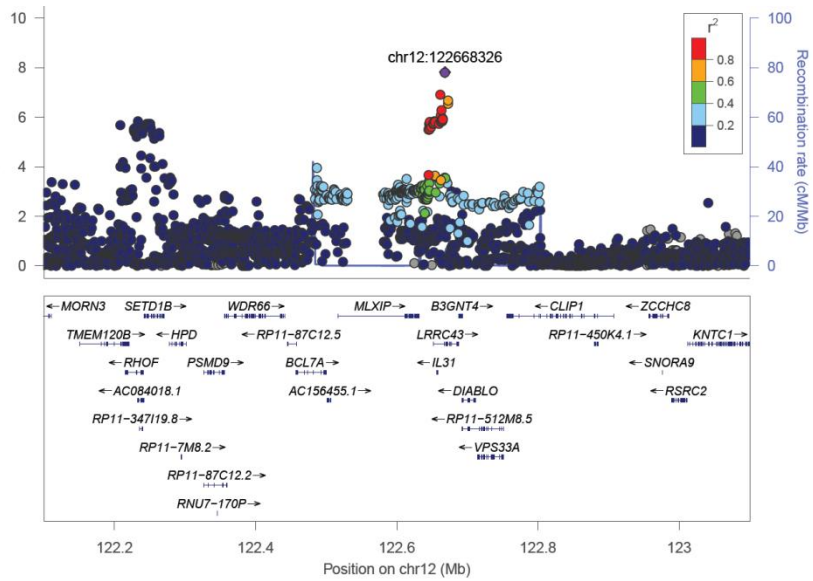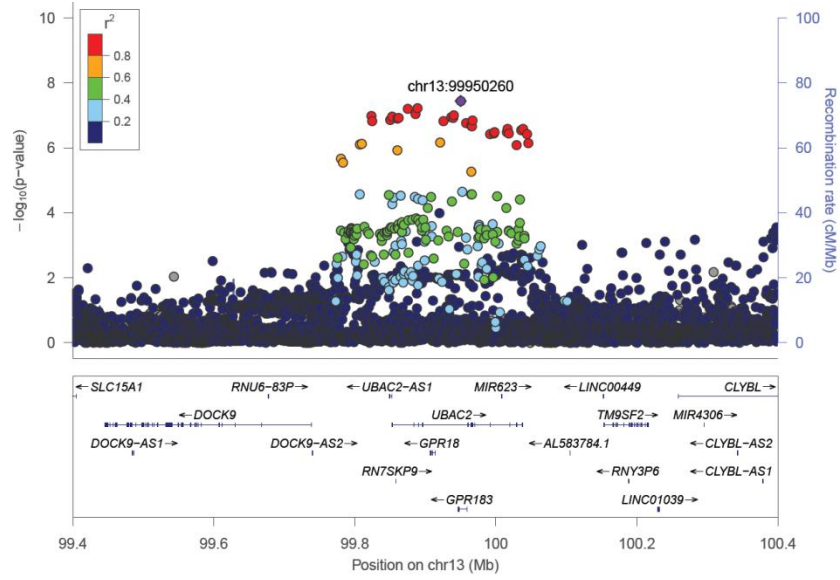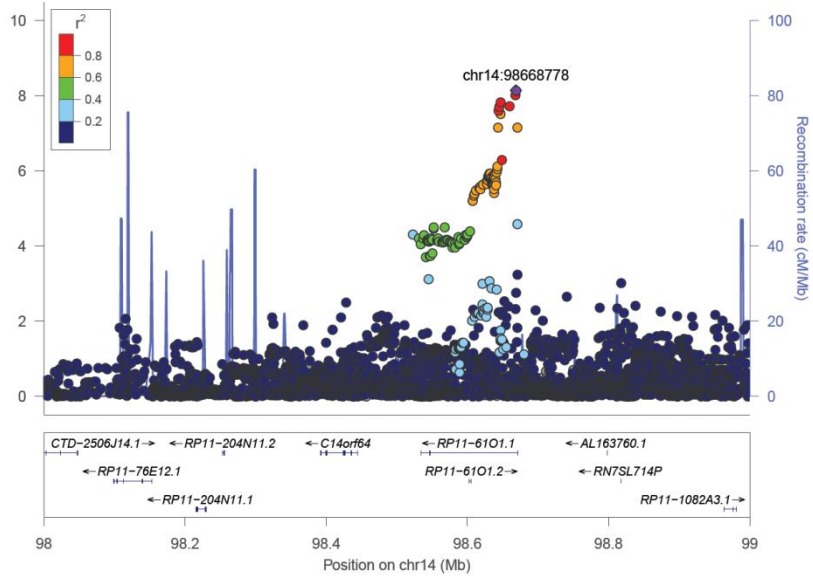



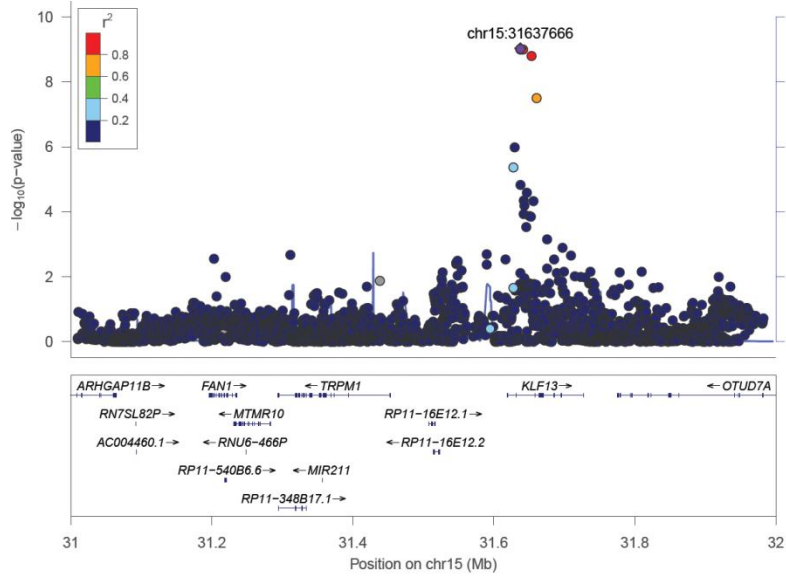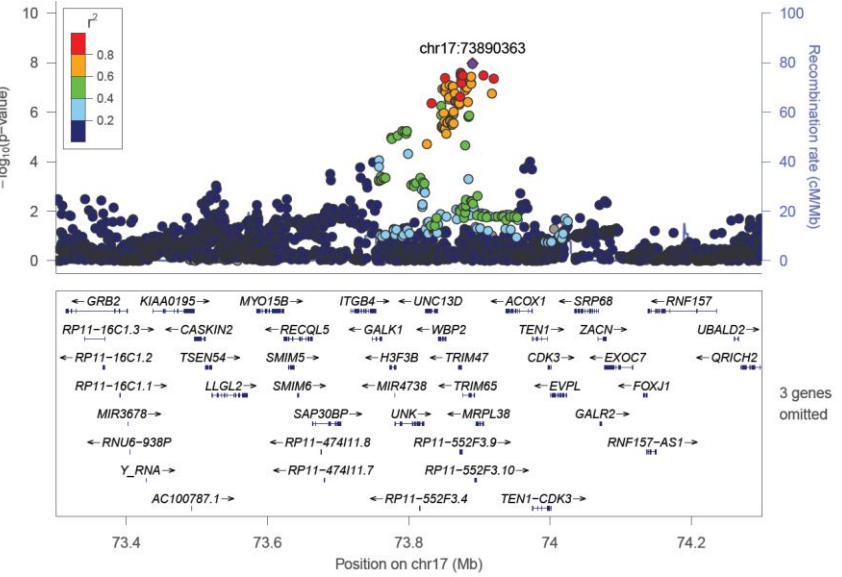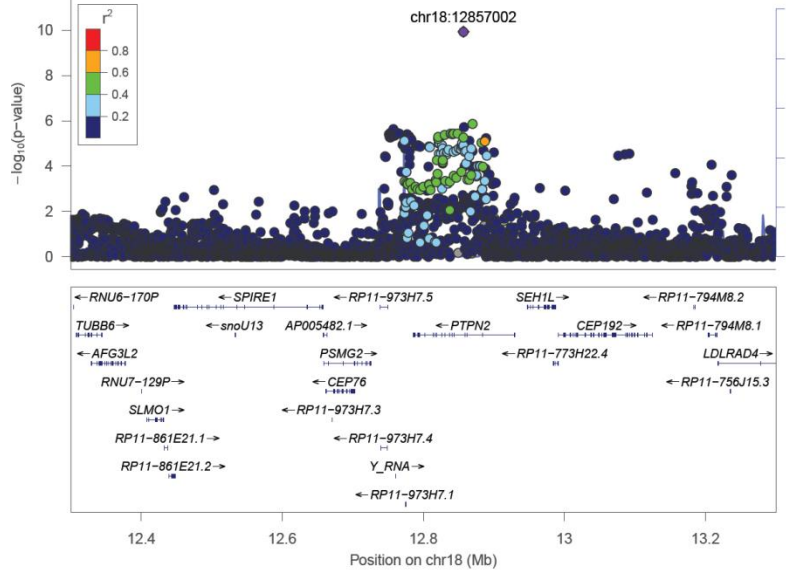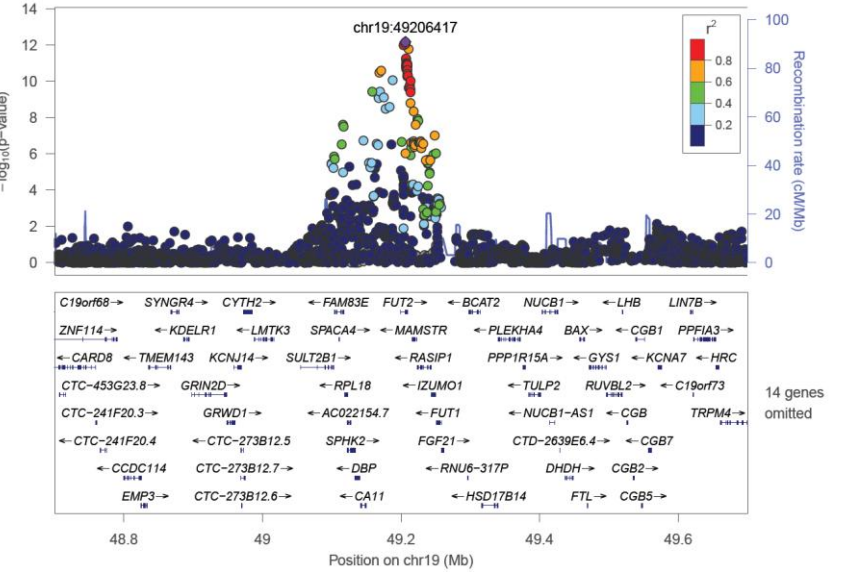



**Supplementary Figure 5. Regional association plots for 16 new psoriasis loci identified in this cohort.** The y-axis represents the  $-\log_{10}$  p-values of the meta-analysis results (left) and recombination rate (right). Build 37 (GRCh37) was used to generate these plots

.

**chr1:78450517 A/C**

23andme  
cas  
exomechip  
genizon  
kiel  
page  
psagwas  
wtccc2

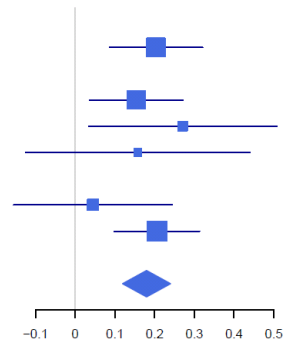

**Summary**

**chr1:172675097 T/C**

23andme  
cas  
exomechip  
genizon  
kiel  
page  
psagwas  
wtccc2

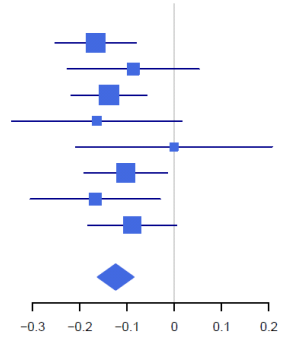

**Summary**

**chr1:206655331 T/C**

23andme  
cas  
exomechip  
genizon  
kiel  
page  
psagwas  
wtccc2

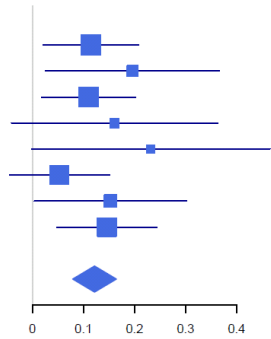

**Summary**

**chr10:64369999 C/G**

23andme  
cas  
exomechip  
genizon  
kiel  
page  
psagwas  
wtccc2

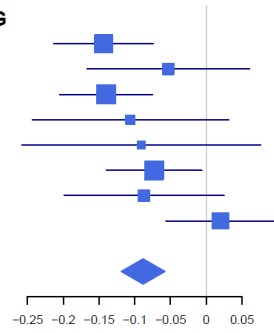

**Summary**

**chr10:89824771 A/G**

23andme  
cas  
exomechip  
genizon  
kiel  
page  
psagwas  
wtccc2

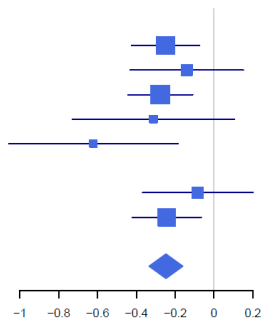

**Summary**

**chr10:102038641 A/G**

23andme  
cas  
exomechip  
genizon  
kiel  
page  
psagwas  
wtccc2

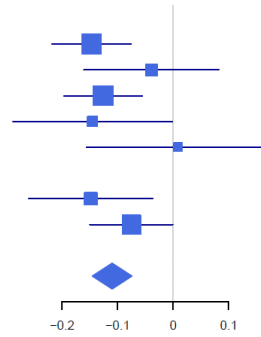

**Summary**

**chr11:65593444 A/T**

23andme  
casp  
exomechip  
genizon  
kiel  
page  
psagwas  
wtccc2

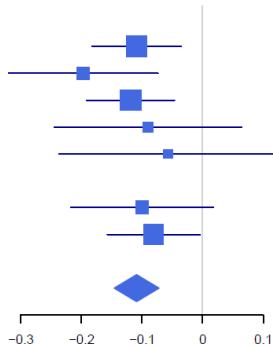

**Summary**

**chr12:10597207 T/C**

23andme  
casp  
exomechip  
genizon  
kiel  
page  
psagwas  
wtccc2

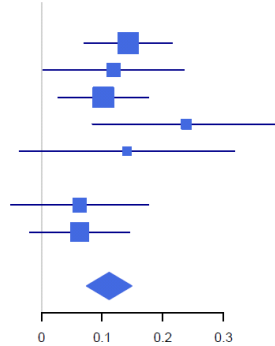

**Summary**

**chr12:112059557 T/C**

23andme  
casp  
exomechip  
genizon  
kiel  
page  
psagwas  
wtccc2

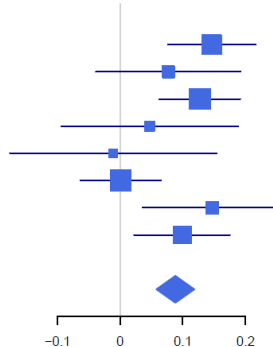

**Summary**

**chr12:122668326 A/G**

23andme  
casp  
exomechip  
genizon  
kiel  
page  
psagwas  
wtccc2

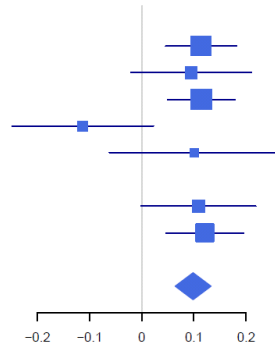

**Summary**

**chr13:99950260 A/G**

23andme  
casp  
exomechip  
genizon  
kiel  
page  
psagwas  
wtccc2

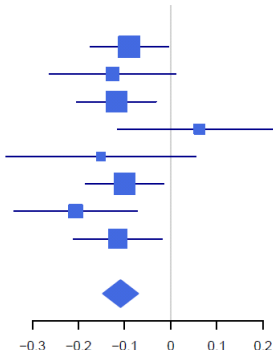

**Summary**

**chr14:98668778:D A/G**

23andme  
casp  
exomechip  
genizon  
kiel  
page  
psagwas  
wtccc2

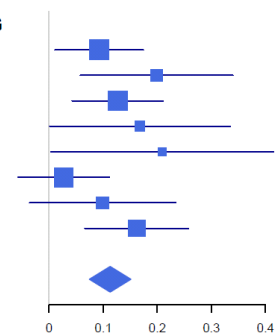

**Summary**

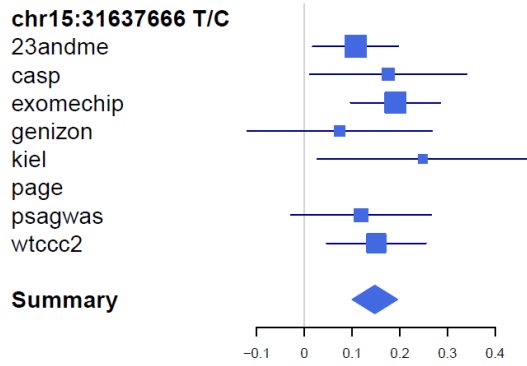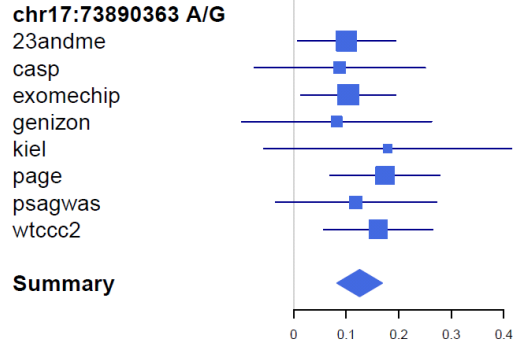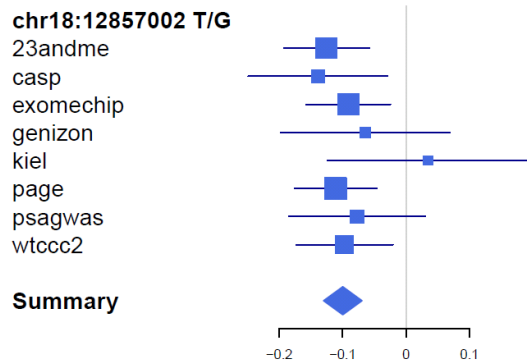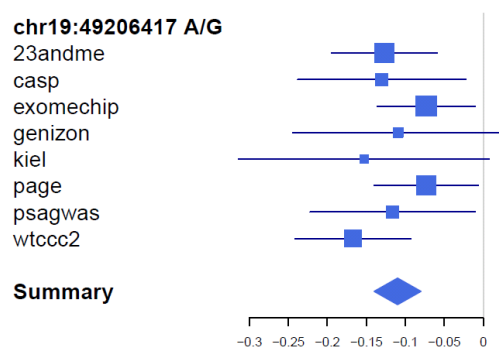

**Supplementary Figure 6. Forest plots for the 16 novel loci to illustrate the betas and 95% confidence intervals for each cohort and the meta-analysis. The effect and non-effect alleles are shown after the marker positions for each locus. The x-axes denote the effect sizes.**

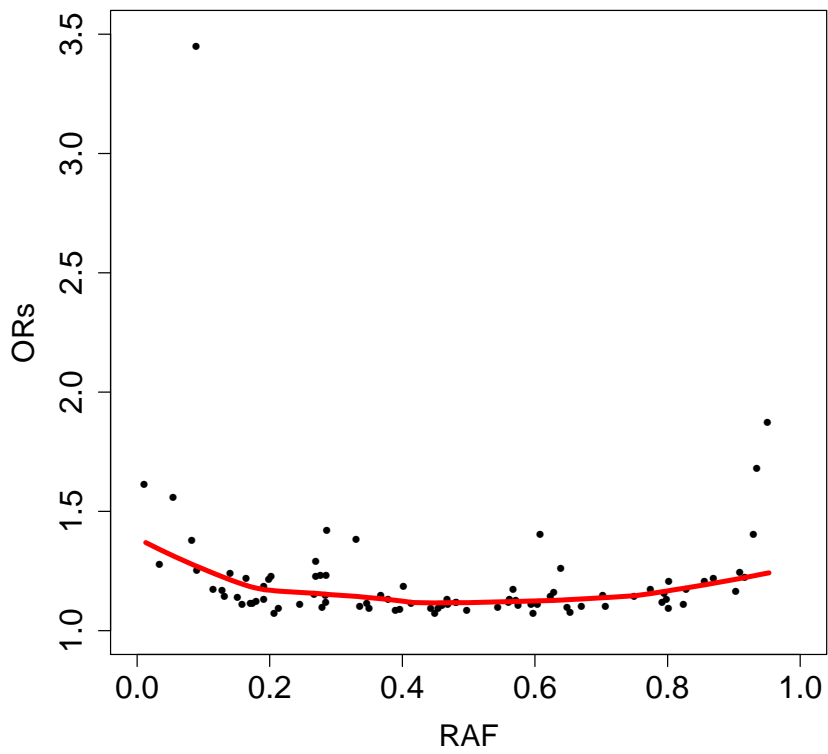

**Supplementary Figure 7. Effect sizes (odds ratios, OR) versus risk allele frequencies (RAF) for all loci.**

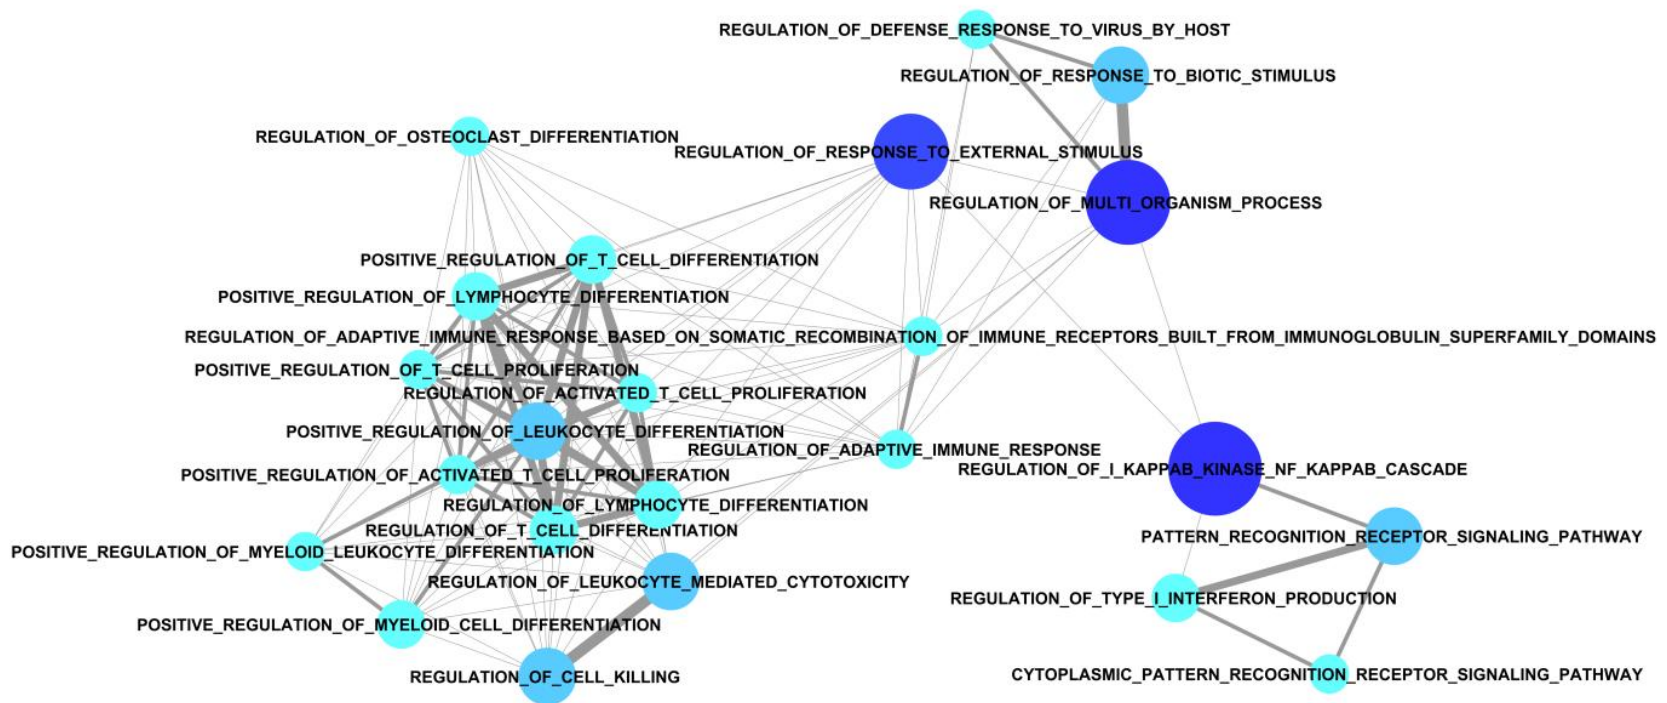

**Supplementary Figure 8. Enriched functions with genes overlapped with other enriched function.** This is the reproduction of Figure 2a with node labels. Enriched functions (nodes) among the associated loci identified using MEAGA. For illustration purposes, only functions with at least four genes overlapping with other enriched functions are shown. The size of the nodes and the width of the edges correlate with the number of overlapped disease-loci and the number of shared disease-loci, respectively. Blue color represents higher number of overlapped loci and red color represents lower number of overlapped loci.



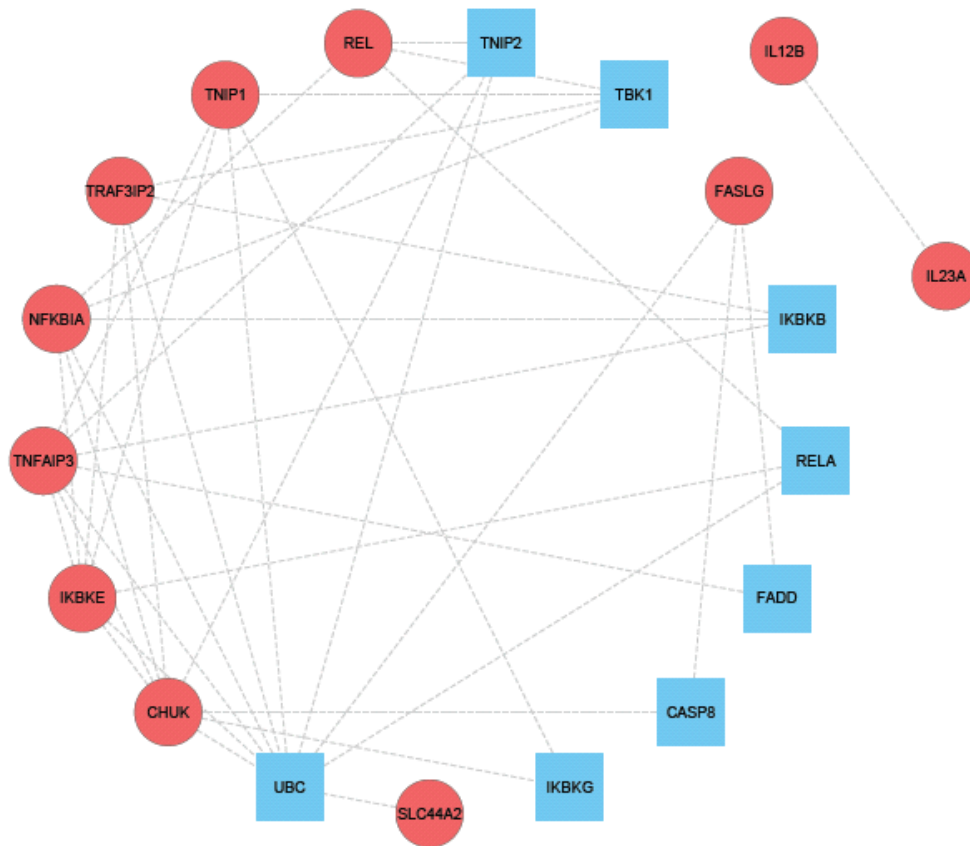

**Supplementary Figure 9. Genes from the enriched function (“Regulation of I- $\kappa$ B kinase/NF $\kappa$ B cascade”) which has one of the highest number of associated loci-overlapped genes. Red color represents genes from the associated loci, and blue color represents genes from the enriched function that have interactions with associated loci.**

## Supplementary Table

**Supplementary Table 1. Datasets used in the meta-analysis.** The number of cohort-defined cases/controls after quality control are listed.

| Cohort                       | Number of defined cases after QC | Number of defined controls after QC | Effective Sample size* | Number of well-imputed markers ( $r^2 \geq 0.7$ ) | Dataset Genomic Inflation factor |
|------------------------------|----------------------------------|-------------------------------------|------------------------|---------------------------------------------------|----------------------------------|
| PsA GWAS                     | 1,430                            | 1,417                               | 2,847                  | 10,752,852                                        | 1.03                             |
| CASP GWAS <sup>1</sup>       | 1,352                            | 1,389                               | 2,741                  | 8,748,985                                         | 1.02                             |
| Kiel GWAS <sup>2</sup>       | 464                              | 1,135                               | 1,317                  | 8,920,790                                         | 1.05                             |
| Genizon GWAS <sup>2</sup>    | 761                              | 993                                 | 1,723                  | 9,046,475                                         | 1.02                             |
| WTCCC2 GWAS <sup>3</sup>     | 2,178                            | 5,175                               | 6,131                  | 10,582,016                                        | 1.04                             |
| Exomechip w/ GWAS content    | 3,863                            | 4,028                               | 7,888                  | 8,394,884                                         | 1.02                             |
| PAGE Immunochip <sup>4</sup> | 3,181                            | 7,406                               | 8,901                  | 757,723                                           | 1.02                             |
| 23andMe GWAS                 | 5,803 <sup>#</sup>               | 265,226 <sup>#</sup>                | 7,950                  | 11,134,041                                        | 1.05                             |
| <b>TOTAL</b>                 | 19,032                           | 286,769                             | 39,498                 |                                                   |                                  |

<sup>#</sup>Estimated numbers of true cases and controls based on self-reported data and misclassification estimation (see Methods)

\*The effective sample size for each cohort with dermatologist-defined cases was computed as:  $4/(1/N_{\text{case}}+1/N_{\text{control}})$ ; the 23andMe GWAS uses self-reported information to define cases, and we determined the effective sample size using misclassification adjustment simulated data and the asymptotic relative efficiency approach (see **Methods**).

**Supplementary Table 2. Summary statistics for previously identified loci.** EA: effect allele; NEA: non-effect allele. Direction represents whether the EA increases (+) or decreases (-) the risk of psoriasis.

| Chr | Position  | EA | NEA | Beta    | p-value   | Direction |
|-----|-----------|----|-----|---------|-----------|-----------|
| 1   | 8286009   | a  | g   | 0.1208  | 4.26E-10  | +++++++   |
| 1   | 24518206  | t  | c   | -0.1512 | 4.82E-16  | -?-----   |
| 1   | 25291010  | a  | t   | -0.1407 | 2.93E-19  | -----     |
| 1   | 67713346  | t  | c   | 0.3904  | 2.46E-29  | +++++++   |
| 1   | 69788482  | t  | g   | -0.0682 | 0.0001644 | -----+    |
| 1   | 152591953 | c  | g   | 0.1771  | 1.63E-27  | +++++++   |
| 1   | 197757846 | c  | g   | -0.1005 | 3.53E-07  | -----     |
| 2   | 61072183  | a  | t   | 0.1665  | 2.33E-26  | +++++++   |
| 2   | 62560332  | a  | g   | 0.1157  | 2.78E-13  | +++++++   |
| 2   | 163167746 | c  | g   | 0.3105  | 1.07E-24  | +++++++   |
| 3   | 16996623  | a  | g   | -0.1198 | 2.22E-14  | -----     |
| 3   | 101647309 | t  | g   | -0.1061 | 8.37E-11  | -----     |
| 3   | 189662658 | a  | g   | 0.1394  | 4.95E-09  | +++++++?+ |
| 5   | 40370724  | a  | c   | -0.1215 | 1.41E-05  | -----     |
| 5   | 96118852  | c  | g   | -0.1444 | 4.37E-18  | -----     |
| 5   | 131996445 | a  | g   | -0.196  | 4.91E-23  | -----     |
| 5   | 150469973 | a  | g   | 0.4863  | 9.79E-59  | +++++++   |
| 5   | 158829527 | a  | t   | -0.5294 | 2.92E-84  | -----     |
| 6   | 577820    | a  | g   | 0.091   | 4.60E-09  | -----     |
| 6   | 20689945  | a  | g   | 0.1676  | 6.40E-19  | +++++++   |
| 6   | 30916259  | a  | g   | 1.1598  | 5.58e-325 | +++++++   |
| 6   | 111929862 | t  | g   | 0.3475  | 1.93E-42  | +++++++   |
| 6   | 138197824 | t  | c   | -0.1765 | 1.04E-25  | -----     |
| 6   | 159506600 | t  | c   | -0.1109 | 5.82E-12  | ---+---   |
| 7   | 37385365  | a  | g   | 0.0995  | 1.91E-10  | +++++++   |
| 9   | 32523737  | t  | c   | 0.0918  | 2.84E-09  | +++++++   |
| 9   | 110792282 | t  | c   | 0.1004  | 9.15E-10  | +++++++   |
| 10  | 75601596  | t  | c   | -0.127  | 1.90E-15  | -----     |
| 10  | 81043743  | a  | g   | 0.1062  | 1.72E-11  | +++++++   |
| 11  | 64053157  | t  | g   | 0.0953  | 1.10E-08  | +++++++   |
| 11  | 109962432 | a  | g   | 0.1239  | 9.32E-16  | +++++++   |
| 11  | 128391937 | t  | c   | 0.1426  | 8.69E-15  | +++++++   |
| 12  | 56741228  | a  | g   | -0.3421 | 3.79E-25  | -----     |
| 13  | 40745693  | a  | g   | -0.2019 | 1.21E-07  | -----?-   |
| 13  | 45321731  | a  | c   | -0.0972 | 1.18E-08  | -----     |
| 14  | 35839236  | c  | g   | 0.1521  | 1.92E-19  | +++++++   |
| 16  | 11354091  | a  | g   | 0.1367  | 9.84E-16  | +++++++   |

|    |          |   |   |         |          |          |
|----|----------|---|---|---------|----------|----------|
| 16 | 31021078 | t | c | 0.1275  | 1.13E-15 | ++++++   |
| 17 | 26124908 | a | g | 0.2118  | 9.23E-23 | ++++++   |
| 17 | 40536396 | t | c | -0.1024 | 1.84E-10 | -----    |
| 17 | 78175483 | t | c | 0.1015  | 1.27E-08 | +++++?+  |
| 18 | 51816394 | t | c | 0.1214  | 1.04E-12 | ++++++   |
| 19 | 10463118 | c | g | -0.6762 | 3.39E-43 | -?-?---- |
| 19 | 10886206 | t | g | -0.0994 | 2.00E-10 | -----    |
| 20 | 48574454 | a | g | -0.1462 | 6.52E-21 | -----    |
| 21 | 36488822 | t | c | -0.1181 | 6.10E-08 | -----    |
| 22 | 21974703 | c | g | 0.1377  | 6.81E-13 | ++++++   |

**Supplementary Table 3. Detailed information regarding the new loci identified in this study.** The “Meta p without 23andMe” column shows the p-values of the meta-analysis including all but the 23andMe dataset. The “Meta P value (wo/adj)” and “Meta P value (w/adj)” illustrate the meta-analysis results without and with the Duffy’s adjustment, respectively. The “Direction” column indicates the direction of the meta-analysis-identified risk allele in each dataset (P: PsA GWAS; C: CASP GWAS; K: Kiel GWAS; G: Genizon GWAS; W: WTCCC2; E: Exomechip; I: PAGE Immunochip; M: 23andMe GWAS).

| Chr | Pos       | Marker      | Meta p without 23andMe | Meta P value (wo/adj) | Meta OR (wo/adj) | Meta P value (w/adj) | Heterogeneity p-value (w/adj) | OR(w/adj) | Direction (PCKGWEIM) | Nearby genes               |
|-----|-----------|-------------|------------------------|-----------------------|------------------|----------------------|-------------------------------|-----------|----------------------|----------------------------|
| 1   | 78450517  | rs34517439  | 1.19E-06               | 4.95E-08              | 1.10             | 4.43E-09             | 0.72                          | 1.18      | +?++++?+             | <i>FUBP1</i>               |
| 1   | 172675097 | rs12118303  | 2.07E-07               | 7.17E-10              | 1.08             | 3.02E-10             | 0.8                           | 1.12      | +++++++              | <i>FASLG</i>               |
| 1   | 206655331 | rs41298997  | 4.01E-07               | 1.09E-06              | 1.07             | 2.37E-08             | 0.78                          | 1.13      | +++++++              | <i>IKBKE</i>               |
| 10  | 64369999  | rs2944542   | 1.35E-05               | 3.27E-09              | 1.06             | 1.76E-08             | 7.8E-02                       | 1.08      | ++++-+++             | <i>ZNF365</i>              |
| 10  | 89824771  | rs76959677  | 1.37E-06               | 7.49E-07              | 1.14             | 2.75E-08             | 0.59                          | 1.28      | +++++?+              | <i>PTEN, KLLN, SNORD74</i> |
| 10  | 102038641 | rs61871342  | 2.63E-06               | 1.93E-09              | 1.07             | 1.56E-09             | 0.44                          | 1.10      | ++-+++?+             | <i>CHUK</i>                |
| 11  | 65593444  | rs118086960 | 4.65E-07               | 2.63E-07              | 1.06             | 6.89E-09             | 0.82                          | 1.12      | +++++?+              | <i>CFL1, FIBP, FOSL1</i>   |
| 12  | 10597207  | rs11053802  | 4.01E-06               | 9.09E-09              | 1.07             | 4.17E-09             | 0.49                          | 1.11      | +++++?+              | <i>KLRK1, KLRC4</i>        |
| 12  | 112059557 | rs11065979  | 1.38E-05               | 2.41E-09              | 1.06             | 1.67E-08             | 6.09E-02                      | 1.08      | ++-++++              | <i>BRAP, MAPKAPK5</i>      |
| 12  | 122668326 | rs11059675  | 2.77E-06               | 1.23E-07              | 1.06             | 1.50E-08             | 0.13                          | 1.10      | +++--+?+             | <i>IL31</i>                |
| 13  | 99950260  | rs9513593   | 2.75E-07               | 3.12E-06              | 1.06             | 3.60E-08             | 0.29                          | 1.12      | +++-++++             | <i>UBAC2, RN7SKP9</i>      |
| 14  | 98668778  | rs142903734 | 7.08E-08               | 1.08E-06              | 1.06             | 7.15E-09             | 0.34                          | 1.12      | +++++++              | <i>RP11-6101.1</i>         |
| 15  | 31637666  | rs28624578  | 4.15E-08               | 8.00E-07              | 1.07             | 9.22E-10             | 0.80                          | 1.18      | +++++?+              | <i>KLF13</i>               |
| 17  | 73890363  | rs55823223  | 8.39E-08               | 1.61E-06              | 1.07             | 1.06E-08             | 0.94                          | 1.15      | +++++++              | <i>TRIM47, TRIM65</i>      |
| 18  | 12857002  | rs559406    | 5.72E-08               | 7.05E-10              | 1.06             | 1.19E-10             | 0.75                          | 1.10      | ++-++++              | <i>PTPN2</i>               |
| 19  | 49206417  | rs492602    | 4.24E-10               | 2.23E-11              | 1.07             | 6.57E-13             | 0.62                          | 1.11      | +++++++              | <i>FUT2</i>                |

**Supplementary Table 4. Information for the independent signals used to construct Figure 1 and used for the regulatory element enrichment analysis. RA: risk allele; NRA: non-risk allele.**

|                  | RA | NRA | OR   | MAF  |
|------------------|----|-----|------|------|
| chr1:8273177     | G  | T   | 1.15 | 0.29 |
| chr1:24518643    | G  | A   | 1.21 | 0.14 |
| chr1:25297184    | A  | G   | 1.14 | 0.47 |
| chr1:67702526    | T  | G   | 1.68 | 0.06 |
| chr1:67705574    | T  | C   | 1.12 | 0.40 |
| chr1:67619259    | G  | T   | 1.11 | 0.34 |
| chr1:69788482    | G  | T   | 1.12 | 0.25 |
| chr1:152593549   | T  | C   | 1.26 | 0.36 |
| chr2:61083506    | T  | C   | 1.17 | 0.37 |
| chr2:62552321    | A  | G   | 1.14 | 0.38 |
| chr2:163110536   | G  | A   | 1.41 | 0.39 |
| chr2:163128824   | T  | C   | 1.30 | 0.27 |
| chr3:16996035    | G  | A   | 1.12 | 0.48 |
| chr3:101663555   | A  | G   | 1.14 | 0.20 |
| chr5:40370724    | C  | A   | 1.17 | 0.09 |
| chr5:96120170    | G  | A   | 1.24 | 0.29 |
| chr5:96290647    | T  | C   | 1.09 | 0.39 |
| chr5:131996669   | C  | T   | 1.16 | 0.20 |
| chr5:150466690:D | G  | A   | 1.56 | 0.06 |
| chr5:158826310   | G  | C   | 1.22 | 0.20 |
| chr5:158748012   | C  | T   | 1.21 | 0.19 |
| chr5:158829527   | T  | A   | 1.26 | 0.09 |
| chr5:158812417   | C  | T   | 1.15 | 0.29 |
| chr5:158871681   | T  | A   | 1.23 | 0.08 |
| chr5:158839745   | T  | C   | 1.10 | 0.35 |
| chr6:515393      | C  | T   | 1.12 | 0.42 |
| chr6:31251924    | T  | C   | 3.45 | 0.09 |
| chr6:31353651:I  | C  | A   | 1.39 | 0.33 |
| chr6:29803526    | T  | G   | 1.43 | 0.29 |
| chr6:31249217    | A  | G   | 1.23 | 0.20 |
| chr6:31431820    | C  | T   | 1.12 | 0.17 |
| chr6:31457362    | C  | A   | 1.19 | 0.20 |
| chr6:29555585    | A  | G   | 1.15 | 0.25 |
| chr6:32392757    | A  | G   | 1.62 | 0.01 |
| chr6:31264823    | A  | G   | 1.22 | 0.17 |
| chr6:29923554    | T  | C   | 1.19 | 0.40 |
| chr6:31553151:D  | A  | G   | 1.23 | 0.13 |



|                  |   |   |      |      |
|------------------|---|---|------|------|
| chr6:111929862   | T | G | 1.38 | 0.09 |
| fachr6:111580561 | C | A | 1.10 | 0.28 |
| chr6:138197824   | C | T | 1.23 | 0.27 |
| chr6:159492044   | T | C | 1.18 | 0.13 |
| chr7:37386237    | A | C | 1.13 | 0.44 |
| chr9:32523737    | T | C | 1.11 | 0.40 |
| chr9:110792282   | T | C | 1.15 | 0.37 |
| chr10:75599127   | A | G | 1.12 | 0.44 |
| chr10:81032532   | A | G | 1.11 | 0.42 |
| chr11:64115137   | C | T | 1.12 | 0.39 |
| chr11:109973130  | C | A | 1.18 | 0.43 |
| chr11:128406438  | A | G | 1.12 | 0.48 |
| chr12:56744422   | G | A | 1.41 | 0.07 |
| chr12:56497903   | T | C | 1.10 | 0.35 |
| chr14:35839236   | C | G | 1.24 | 0.28 |
| chr14:35840257   | C | T | 1.16 | 0.27 |
| chr16:11365500   | C | T | 1.11 | 0.29 |
| chr16:31006972   | T | C | 1.16 | 0.37 |
| chr17:26124908   | A | G | 1.24 | 0.14 |
| chr17:26096473   | A | C | 1.12 | 0.35 |
| chr17:40563017   | A | G | 1.14 | 0.15 |
| chr17:78178830   | A | G | 1.09 | 0.50 |
| chr18:51791375   | C | G | 1.12 | 0.29 |
| chr19:10463118   | G | C | 1.88 | 0.05 |
| chr19:10469975   | A | C | 1.25 | 0.09 |
| chr19:10886206   | G | T | 1.14 | 0.44 |
| chr20:48582769   | A | C | 1.13 | 0.43 |
| chr20:48642702   | T | C | 1.12 | 0.16 |
| chr22:21925017   | G | A | 1.14 | 0.19 |
| chr1:197671115   | T | C | 1.10 | 0.22 |
| chr3:189615475   | C | A | 1.10 | 0.20 |
| chr6:20678430    | C | G | 1.18 | 0.22 |
| chr13:40333369   | T | C | 1.08 | 0.34 |
| chr13:45334194   | C | T | 1.09 | 0.40 |
| chr21:36470865   | T | C | 1.08 | 0.21 |
| chr1:78450517    | A | C | 1.18 | 0.12 |
| chr1:172675097   | C | T | 1.12 | 0.17 |
| chr1:206655331   | T | C | 1.13 | 0.18 |
| chr10:64369999   | G | C | 1.08 | 0.40 |
| chr10:89824771   | G | A | 1.28 | 0.04 |
| chr10:102038641  | G | A | 1.10 | 0.45 |

|                         |   |   |      |      |
|-------------------------|---|---|------|------|
| <b>chr11:65593444</b>   | T | A | 1.12 | 0.47 |
| <b>chr12:10597207</b>   | T | C | 1.11 | 0.33 |
| <b>chr12:112059557</b>  | T | C | 1.08 | 0.45 |
| <b>chr12:122668326</b>  | A | G | 1.10 | 0.46 |
| <b>chr13:99950260</b>   | G | A | 1.12 | 0.18 |
| <b>chr14:98668778:D</b> | A | G | 1.12 | 0.21 |
| <b>chr15:31637666</b>   | T | C | 1.18 | 0.17 |
| <b>chr17:73890363</b>   | A | G | 1.15 | 0.13 |
| <b>chr18:12857002</b>   | G | T | 1.10 | 0.45 |
| <b>chr19:49206417</b>   | G | A | 1.11 | 0.46 |

**Supplementary Table 5. Heritability explained (%) by known loci using GCTA.** Heritability explained by psoriasis loci determined by (the phenotypic variance explained by psoriasis loci) / (phenotypic variance explained by genotyped markers in the corresponding cohort).

| Psoriasis Prevalence | Cohort           |                  |                |
|----------------------|------------------|------------------|----------------|
|                      | PAGE             | Exomechip (full) | WTCCC2         |
| <b>2%</b>            | 13/24.7 = 52.6   | 11/46.4 = 23.7   | 16.3/74.2 = 22 |
| <b>2.5%</b>          | 13.8/26.2 = 52.7 | 11.7/49.2 = 23.8 | 17.3/78.7 = 22 |
| <b>3%</b>            | 14.5/27.6 = 52.5 | 12.3/51.8 = 23.7 | 18.2/82.8 = 22 |

**Supplementary Table 6. Enriched functions identified by MEAGA.**

| Enriched Functions                                                                 | # genes in functions | # of overlapped genes | # of connected graph | pval      | False Discovery Rate | Genes                                     |
|------------------------------------------------------------------------------------|----------------------|-----------------------|----------------------|-----------|----------------------|-------------------------------------------|
| POSITIVE_REGULATION_OF_CELL_FATE_COMMITMENT                                        | 6                    | 3                     | 1                    | ≤2.00E-05 | ≤2.08E-02            | IL12B;IL23A;IL23R                         |
| REGULATION_OF_T_HELPER_1_TYPE_IMMUNE_RESPONSE                                      | 20                   | 3                     | 1                    | ≤2.00E-05 | ≤2.08E-02            | IL12B;IL23A;IL23R                         |
| NEGATIVE_REGULATORS_OF_RIG_I_MDA5_SIGNALING                                        | 22                   | 4                     | 1                    | ≤2.00E-05 | ≤2.08E-02            | DDX58;IFIH1;TNFAIP3;IKBKE                 |
| REGULATION_OF_TYPE_I_INTERFERON_PRODUCTION                                         | 70                   | 6                     | 1                    | ≤2.00E-05 | ≤2.08E-02            | CHUK;DDX58;IFIH1;IKBKE;NFKBIA;TNFAIP3     |
| POSITIVE_REGULATION_OF_NATURAL_KILLER_CELL_ACTIVATION                              | 18                   | 4                     | 2                    | ≤2.00E-05 | ≤2.08E-02            | IL12B;IL23A;IL23R;STAT5A                  |
| REGULATION_OF_NK_T_CELL_ACTIVATION                                                 | 6                    | 3                     | 1                    | ≤2.00E-05 | ≤2.08E-02            | IL12B;IL23A;IL23R                         |
| POSITIVE_REGULATION_OF_MYELOID_CELL_DIFFERENTIATION                                | 63                   | 6                     | 3                    | ≤2.00E-05 | ≤2.08E-02            | ETS1;IL12B;IL23A;IL23R;RUNX1;STAT5A       |
| POSITIVE_REGULATION_OF_T_HELPER_1_TYPE_IMMUNE_RESPONSE                             | 9                    | 3                     | 1                    | ≤2.00E-05 | ≤2.08E-02            | IL12B;IL23A;IL23R                         |
| REGULATION_OF_ACTIVATION_OF_JANUS_KINASE_ACTIVITY                                  | 7                    | 3                     | 1                    | ≤2.00E-05 | ≤2.08E-02            | IL12B;IL23A;IL23R                         |
| POSITIVE_REGULATION_OF_OSTEOCLAST_DIFFERENTIATION                                  | 15                   | 3                     | 1                    | ≤2.00E-05 | ≤2.08E-02            | IL12B;IL23A;IL23R                         |
| POSITIVE_REGULATION_OF_ACTIVATION_OF_JANUS_KINASE_ACTIVITY                         | 7                    | 3                     | 1                    | ≤2.00E-05 | ≤2.08E-02            | IL12B;IL23A;IL23R                         |
| REGULATION_OF_LEUKOCYTE_MEDIATED_CYTOTOXICITY                                      | 33                   | 7                     | 4                    | ≤2.00E-05 | ≤2.08E-02            | ICAM1;IL12B;IL23A;IL23R;KLRK1;NOS2;STAT5A |
| REGULATION_OF_ACTIVATION_OF_JAK2_KINASE_ACTIVITY                                   | 6                    | 3                     | 1                    | ≤2.00E-05 | ≤2.08E-02            | IL12B;IL23A;IL23R                         |
| REGULATION_OF_CELL_FATE_COMMITMENT                                                 | 25                   | 3                     | 1                    | ≤2.00E-05 | ≤2.08E-02            | IL12B;IL23A;IL23R                         |
| REGULATION_OF_TYROSINE_PHOSPHORYLATION_OF_STAT5_PROTEIN                            | 18                   | 4                     | 2                    | ≤2.00E-05 | ≤2.08E-02            | IL12B;IL23A;IL23R;IL4                     |
| POSITIVE_REGULATION_OF_INTERLEUKIN_17_PRODUCTION                                   | 11                   | 3                     | 1                    | ≤2.00E-05 | ≤2.08E-02            | IL12B;IL23A;IL23R                         |
| REGULATION_OF_T_HELPER_17_TYPE_IMMUNE_RESPONSE                                     | 7                    | 4                     | 2                    | ≤2.00E-05 | ≤2.08E-02            | IL12B;IL23A;IL23R;IL4                     |
| POSITIVE_REGULATION_OF_T_HELPER_17_TYPE_IMMUNE_RESPONSE                            | 6                    | 3                     | 1                    | ≤2.00E-05 | ≤2.08E-02            | IL12B;IL23A;IL23R                         |
| REGULATION_OF_MEMORY_T_CELL_DIFFERENTIATION                                        | 7                    | 3                     | 1                    | ≤2.00E-05 | ≤2.08E-02            | IL12B;IL23A;IL23R                         |
| REGULATION_OF_INTERLEUKIN_10_PRODUCTION                                            | 29                   | 4                     | 2                    | ≤2.00E-05 | ≤2.08E-02            | IL12B;IL23A;IL23R;IL4                     |
| POSITIVE_REGULATION_OF_GRANULOCYTE_MACROPHAGE_COLONY_STIMULATING_FACTOR_PRODUCTION | 6                    | 3                     | 1                    | ≤2.00E-05 | ≤2.08E-02            | IL12B;IL23A;IL23R                         |
| POSITIVE_REGULATION_OF_MEMORY_T_CELL_DIFFERENTIATION                               | 5                    | 3                     | 1                    | ≤2.00E-05 | ≤2.08E-02            | IL12B;IL23A;IL23R                         |

|                                                                           |     |    |   |           |           |                                                           |
|---------------------------------------------------------------------------|-----|----|---|-----------|-----------|-----------------------------------------------------------|
| REGULATION_OF_INTERLEUKIN_17_PRODUCTION                                   | 18  | 3  | 1 | ≤2.00E-05 | ≤2.08E-02 | IL12B;IL23A;IL23R                                         |
| REGULATION_OF_DEFENSE_RESPONSE_TO_VIRUS_BY_HOST                           | 23  | 5  | 3 | ≤2.00E-05 | ≤2.08E-02 | DDX58;IL12B;IL23A;IL23R;TNFAIP3                           |
| POSITIVE_REGULATION_OF_ACTIVATED_T_CELL_PROLIFERATION                     | 18  | 5  | 3 | ≤2.00E-05 | ≤2.08E-02 | IL12B;IL23A;IL23R;IL4;STAT5A                              |
| POSITIVE_REGULATION_OF_ACTIVATION_OF_JAK2_KINASE_ACTIVITY                 | 6   | 3  | 1 | ≤2.00E-05 | ≤2.08E-02 | IL12B;IL23A;IL23R                                         |
| NEGATIVE_REGULATION_OF_INTERLEUKIN_10_PRODUCTION                          | 7   | 3  | 1 | ≤2.00E-05 | ≤2.08E-02 | IL12B;IL23A;IL23R                                         |
| POSITIVE_REGULATION_OF_NK_T_CELL_ACTIVATION                               | 5   | 3  | 1 | ≤2.00E-05 | ≤2.08E-02 | IL12B;IL23A;IL23R                                         |
| CYTOPLASMIC_PATTERN_RECOGNITION_RECEPTOR_SIGNALING_PATHWAY                | 31  | 5  | 1 | ≤2.00E-05 | ≤2.08E-02 | CHUK;DDX58;IFIH1;NFKBIA;TNFAIP3                           |
| REGULATION_OF_CELL_KILLING                                                | 36  | 7  | 4 | ≤2.00E-05 | ≤2.08E-02 | ICAM1;IL12B;IL23A;IL23R;KLRK1;NOS2;STAT5A                 |
| POSITIVE_REGULATION_OF_ALPHA_BETA_T_CELL_ACTIVATION                       | 44  | 3  | 1 | ≤2.00E-05 | ≤2.08E-02 | IL12B;IL23A;IL23R                                         |
| CYTOSOLIC_DNA_SENSING_PATHWAY                                             | 56  | 4  | 1 | ≤2.00E-05 | ≤2.08E-02 | CHUK;DDX58;NFKBIA;IKBKE                                   |
| REGULATION_OF_MULTI_ORGANISM_PROCESS                                      | 216 | 10 | 2 | ≤2.00E-05 | ≤2.08E-02 | DDX58;ELMO1;FYN;IL12B;IL23A;IL23R;ILF3;NOS2;TNFAIP3;TNIP1 |
| REGULATION_OF_NATURAL_KILLER_CELL_ACTIVATION                              | 24  | 4  | 2 | ≤2.00E-05 | ≤2.08E-02 | IL12B;IL23A;IL23R;STAT5A                                  |
| TRAF3_DEPENDENT_IRF_ACTIVATION_PATHWAY                                    | 12  | 3  | 1 | ≤2.00E-05 | ≤2.08E-02 | DDX58;IFIH1;IKBKE                                         |
| PATTERN_RECOGNITION_RECEPTOR_SIGNALING_PATHWAY                            | 132 | 7  | 1 | ≤2.00E-05 | ≤2.08E-02 | CHUK;DDX58;IFIH1;IKBKE;NFKBIA;TNFAIP3;TNIP1               |
| DEFENSE_RESPONSE_TO_GRAM_NEGATIVE_BACTERIUM                               | 18  | 4  | 2 | ≤2.00E-05 | ≤2.08E-02 | IL12B;IL23A;IL23R;NOS2                                    |
| POSITIVE_REGULATION_OF_NATURAL_KILLER_CELL_PROLIFERATION                  | 6   | 3  | 1 | ≤2.00E-05 | ≤2.08E-02 | IL12B;IL23A;IL23R                                         |
| REGULATION_OF_ACTIVATED_T_CELL_PROLIFERATION                              | 25  | 5  | 3 | ≤2.00E-05 | ≤2.08E-02 | IL12B;IL23A;IL23R;IL4;STAT5A                              |
| POSITIVE_REGULATION_OF_TYROSINE_PHOSPHORYLATION_OF_STAT5_PROTEIN          | 16  | 4  | 2 | ≤2.00E-05 | ≤2.08E-02 | IL12B;IL23A;IL23R;IL4                                     |
| REGULATION_OF_GRANULOCYTE_MACROPHAGE_COLONY_STIMULATING_FACTOR_PRODUCTION | 10  | 3  | 1 | ≤2.00E-05 | ≤2.08E-02 | IL12B;IL23A;IL23R                                         |
| REGULATION_OF_T_HELPER_17_CELL_DIFFERENTIATION                            | 5   | 4  | 2 | ≤2.00E-05 | ≤2.08E-02 | IL12B;IL23A;IL23R;IL4                                     |
| POSITIVE_REGULATION_OF_TYROSINE_PHOSPHORYLATION_OF_STAT3_PROTEIN          | 27  | 3  | 1 | ≤2.00E-05 | ≤2.08E-02 | IL12B;IL23A;IL23R                                         |
| REGULATION_OF_TYROSINE_PHOSPHORYLATION_OF_STAT1_PROTEIN                   | 12  | 3  | 1 | ≤2.00E-05 | ≤2.08E-02 | IL12B;IL23A;IL23R                                         |
| REGULATION_OF_NATURAL_KILLER_CELL_PROLIFERATION                           | 7   | 3  | 1 | ≤2.00E-05 | ≤2.08E-02 | IL12B;IL23A;IL23R                                         |
| POSITIVE_REGULATION_OF_INTERLEUKIN_12_PRODUCTION                          | 24  | 3  | 1 | ≤2.00E-05 | ≤2.08E-02 | IL12B;IL23A;IL23R                                         |
| POSITIVE_REGULATION_OF_DEFENSE_RESPONSE_TO_VIRUS_BY_HOST                  | 15  | 4  | 2 | ≤2.00E-05 | ≤2.08E-02 | DDX58;IL12B;IL23A;IL23R                                   |

|                                                              |     |    |   |          |          |                                                                       |
|--------------------------------------------------------------|-----|----|---|----------|----------|-----------------------------------------------------------------------|
| REGULATION_OF_RESPONSE_TO_BIOTIC_STIMULUS                    | 87  | 7  | 2 | 4.00E-05 | 3.19E-02 | DDX58;ELMO1;FYN;IL12B;IL23A;IL23R;TNFAIP3                             |
| TRAF6_MEDIATED_IRF7_ACTIVATION                               | 25  | 3  | 1 | 4.00E-05 | 3.19E-02 | DDX58;IFIH1;IKBKE                                                     |
| REGULATION_OF_TYROSINE_PHOSPHORYLATION_OF_STAT3_PROTEIN      | 32  | 4  | 2 | 4.00E-05 | 3.19E-02 | IL12B;IL23A;IL23R;SOCS1                                               |
| REGULATION_OF_ALPHA_BETA_T_CELL_DIFFERENTIATION              | 41  | 4  | 2 | 4.00E-05 | 3.19E-02 | IL12B;IL23A;IL23R;IL4                                                 |
| POSITIVE_REGULATION_OF_LYMPHOCYTE_DIFFERENTIATION            | 65  | 6  | 3 | 4.00E-05 | 3.19E-02 | BAD;IL12B;IL23A;IL23R;IL4;STAT5A                                      |
| REGULATION_OF_T_HELPER_CELL_DIFFERENTIATION                  | 22  | 4  | 2 | 4.00E-05 | 3.19E-02 | IL12B;IL23A;IL23R;IL4                                                 |
| REGULATION_OF_RESPONSE_TO_EXTERNAL_STIMULUS                  | 387 | 9  | 2 | 4.00E-05 | 3.19E-02 | IL12B;IL23A;IL4;PLAU;PSMA6;PTEN;STAT5A;TNFAIP3;TNIP1                  |
| REGULATION_OF_ALPHA_BETA_T_CELL_ACTIVATION                   | 60  | 4  | 2 | 4.00E-05 | 3.19E-02 | IL12B;IL23A;IL23R;IL4                                                 |
| POSITIVE_REGULATION_OF_INTERLEUKIN_10_PRODUCTION             | 16  | 3  | 2 | 4.00E-05 | 3.19E-02 | IL12B;IL23A;IL4                                                       |
| REGULATION_OF_CD4_POSITIVE_ALPHA_BETA_T_CELL_DIFFERENTIATION | 28  | 4  | 2 | 4.00E-05 | 3.19E-02 | IL12B;IL23A;IL23R;IL4                                                 |
| REGULATION_OF_CD4_POSITIVE_ALPHA_BETA_T_CELL_ACTIVATION      | 30  | 4  | 2 | 4.00E-05 | 3.19E-02 | IL12B;IL23A;IL23R;IL4                                                 |
| REGULATION_OF_T_CELL_DIFFERENTIATION                         | 82  | 6  | 3 | 6.00E-05 | 4.53E-02 | BAD;IL12B;IL23A;IL23R;IL4;STAT5A                                      |
| POSITIVE_REGULATION_OF_T_CELL_DIFFERENTIATION                | 54  | 6  | 4 | 6.00E-05 | 4.53E-02 | BAD;IL12B;IL23A;IL23R;IL4;STAT5A                                      |
| HAIR_FOLLICLE_MORPHOGENESIS                                  | 27  | 4  | 2 | 6.00E-05 | 4.53E-02 | RUNX1;RUNX3;SNAI1;TP63                                                |
| REGULATION_OF_OSTEOCLAST_DIFFERENTIATION                     | 41  | 5  | 3 | 6.00E-05 | 4.53E-02 | ESRRA;IL12B;IL23A;IL23R;IL4                                           |
| REGULATION_OF_I_KAPPAB_KINASE_NF_KAPPAB_CASCADE              | 194 | 11 | 2 | 6.00E-05 | 4.53E-02 | CHUK;FASLG;IKBKE;IL12B;IL23A;NFKBIA;REL;SLC4A2;TNFAIP3;TNIP1;TRAF3IP2 |
| REGULATION_OF_TRANSCRIPTION_FACTOR_IMPORT_INTO_NUCLEUS       | 67  | 4  | 2 | 8.00E-05 | 5.52E-02 | DDX58;IL12B;IL23A;NFKBIA                                              |
| NEGATIVE_REGULATION_OF_TYPE_I_INTERFERON_PRODUCTION          | 34  | 4  | 1 | 8.00E-05 | 5.52E-02 | DDX58;IFIH1;IKBKE;TNFAIP3                                             |
| POSITIVE_REGULATION_OF_LEUKOCYTE_DIFFERENTIATION             | 97  | 7  | 3 | 8.00E-05 | 5.52E-02 | BAD;IL12B;IL23A;IL23R;IL4;RUNX1;STAT5A                                |
| POSITIVE_REGULATION_OF_T_CELL_PROLIFERATION                  | 69  | 5  | 3 | 8.00E-05 | 5.52E-02 | IL12B;IL23A;IL23R;IL4;STAT5A                                          |
| POSITIVE_REGULATION_OF_MYELOID_LEUKOCYTE_DIFFERENTIATION     | 37  | 5  | 3 | 8.00E-05 | 5.52E-02 | IL12B;IL23A;IL23R;RUNX1;STAT5A                                        |
| REGULATION_OF_INTERLEUKIN_12_PRODUCTION                      | 44  | 4  | 2 | 8.00E-05 | 5.52E-02 | IL12B;IL23A;IL23R;REL                                                 |
| HAIR_CYCLE_PROCESS                                           | 74  | 4  | 1 | 1.00E-04 | 6.69E-02 | RUNX1;RUNX3;SNAI1;TP63                                                |
| MOLTING_CYCLE                                                | 77  | 4  | 1 | 1.00E-04 | 6.69E-02 | RUNX1;RUNX3;SNAI1;TP63                                                |
| HAIR_FOLLICLE_DEVELOPMENT                                    | 74  | 4  | 1 | 1.00E-04 | 6.69E-02 | RUNX1;RUNX3;SNAI1;TP63                                                |
| MOLTING_CYCLE_PROCESS                                        | 74  | 4  | 1 | 1.00E-04 | 6.69E-02 | RUNX1;RUNX3;SNAI1;TP63                                                |



|                                                                                                                                                  |     |   |   |          |          |                                  |
|--------------------------------------------------------------------------------------------------------------------------------------------------|-----|---|---|----------|----------|----------------------------------|
| HAIR_CYCLE                                                                                                                                       | 77  | 4 | 1 | 1.00E-04 | 6.69E-02 | RUNX1;RUNX3;SNAI1;TP63           |
| POSITIVE_REGULATION_OF_TISSUE_REMODELING                                                                                                         | 21  | 2 | 1 | 1.20E-04 | 7.70E-02 | IL12B;IL23A                      |
| REGULATION_OF_T_CELL_MEDIATED_IMMUNITY                                                                                                           | 35  | 3 | 1 | 1.40E-04 | 8.62E-02 | IL12B;IL23A;IL23R                |
| POSITIVE_REGULATION_OF_ADAPTIVE_IMMUNE_RESPONSE_BASED_ON_SOMATIC_RECOMBINATION_OF_IMMUNE_RECEPTORS_BUILT_FROM_IMMUNOGLOBULIN_SUPERFAMILY_DOMAINS | 45  | 3 | 1 | 1.40E-04 | 8.62E-02 | IL12B;IL23A;IL23R                |
| POSITIVE_REGULATION_OF_T_CELL_MEDIATED_CYTOTOXICITY                                                                                              | 14  | 3 | 1 | 1.40E-04 | 8.62E-02 | IL12B;IL23A;IL23R                |
| REGULATION_OF_T_CELL_MEDIATED_CYTOTOXICITY                                                                                                       | 17  | 3 | 1 | 1.40E-04 | 8.62E-02 | IL12B;IL23A;IL23R                |
| REGULATION_OF_LYMPHOCYTE_DIFFERENTIATION                                                                                                         | 107 | 6 | 3 | 1.40E-04 | 8.62E-02 | BAD;IL12B;IL23A;IL23R;IL4;STAT5A |
| POSITIVE_REGULATION_OF_ADAPTIVE_IMMUNE_RESPONSE                                                                                                  | 48  | 3 | 1 | 1.40E-04 | 8.62E-02 | IL12B;IL23A;IL23R                |
| CHRONIC_MYELOID_LEUKEMIA                                                                                                                         | 73  | 5 | 1 | 1.40E-04 | 8.62E-02 | CHUK;NFKBIA;BAD;STAT5A;RUNX1     |
| POSITIVE_REGULATION_OF_T_CELL_MEDIATED_IMMUNITY                                                                                                  | 26  | 3 | 1 | 1.40E-04 | 8.62E-02 | IL12B;IL23A;IL23R                |
| ACTIVATION_OF_NF_KAPPAB_IN_B_CELLS                                                                                                               | 18  | 3 | 1 | 1.60E-04 | 9.49E-02 | CHUK;NFKBIA;REL                  |
| REGULATION_OF_ADAPTIVE_IMMUNE_RESPONSE                                                                                                           | 92  | 5 | 2 | 1.60E-04 | 9.49E-02 | IL12B;IL23A;IL23R;IL4;TNFAIP3    |
| RIG_I_MDA5_MEDIATED_INDUCION_OF_IFN_ALPHA_BETA_PATHWAYS                                                                                          | 44  | 4 | 1 | 1.60E-04 | 9.49E-02 | DDX58;IFIH1;TNFAIP3;IKBKE        |
| REGULATION_OF_ADAPTIVE_IMMUNE_RESPONSE_BASED_ON_SOMATIC_RECOMBINATION_OF_IMMUNE_RECEPTORS_BUILT_FROM_IMMUNOGLOBULIN_SUPERFAMILY_DOMAINS          | 84  | 5 | 2 | 1.60E-04 | 9.49E-02 | IL12B;IL23A;IL23R;IL4;TNFAIP3    |

**Supplementary Table 7. Enrichment results for regulatory regions among the independent psoriasis signals in different cell types.**

| Cell types               | Enrichment p | Obs | Exp   | Obs/Exp |
|--------------------------|--------------|-----|-------|---------|
| Th1                      | 2.23E-22     | 52  | 18.74 | 2.78    |
| Th0                      | 1.82E-20     | 52  | 19.74 | 2.63    |
| CD25-_IL17+_Th17_stim    | 1.32E-17     | 48  | 19.09 | 2.51    |
| CD45RA_CD8               | 1.66E-16     | 43  | 16.72 | 2.57    |
| CD25-_IL17-_Th_stim_MACS | 1.89E-16     | 49  | 20.57 | 2.38    |
| CD45RO_CD8               | 5.72E-16     | 50  | 21.64 | 2.31    |
| GM12878                  | 2.27E-15     | 50  | 21.84 | 2.29    |
| CD25-_CD45RO+_mem        | 5.23E-15     | 44  | 18.19 | 2.42    |
| CD25+_CD127-_Treg        | 1.07E-13     | 44  | 19.09 | 2.30    |
| Th2                      | 2.39E-13     | 44  | 19.04 | 2.31    |
| CD25-_CD45RA+_naive      | 1.08E-12     | 43  | 19.21 | 2.24    |
| adult_CD14               | 7.70E-12     | 49  | 23.88 | 2.05    |
| adult_CD20               | 4.95E-11     | 41  | 18.96 | 2.16    |
| B_Cell_Centroblast       | 1.59E-09     | 40  | 19.36 | 2.07    |
| Mobilized_CD34           | 3.63E-08     | 38  | 19.74 | 1.92    |
| colonic_mucosa           | 1.98E-07     | 45  | 25.42 | 1.77    |
| Duodenum_mucosa          | 1.12E-06     | 43  | 24.96 | 1.72    |
| chondrogenic_dif_cells   | 1.50E-06     | 46  | 27.60 | 1.67    |
| K562                     | 1.78E-06     | 36  | 19.97 | 1.80    |
| anterior_caudate         | 2.58E-06     | 46  | 27.97 | 1.64    |
| HSMM-myotube             | 1.48E-05     | 46  | 29.10 | 1.58    |
| kidney                   | 1.55E-05     | 41  | 25.06 | 1.64    |
| Pancreatic_Islets        | 4.51E-05     | 40  | 25.25 | 1.58    |
| substantia_nigra         | 5.08E-05     | 39  | 24.39 | 1.60    |
| hippocampus_middle       | 5.18E-05     | 42  | 26.82 | 1.57    |
| NH-Osteoblast            | 6.92E-05     | 42  | 27.11 | 1.55    |
| Liver1                   | 9.07E-05     | 40  | 25.77 | 1.55    |
| mid_frontal_lobe         | 4.47E-04     | 40  | 26.94 | 1.48    |
| AdiposeNuclei            | 4.84E-04     | 40  | 27.07 | 1.48    |
| inferior_temporal_lobe   | 9.85E-04     | 39  | 26.87 | 1.45    |
| cingulate_gyrus          | 2.72E-03     | 37  | 26.27 | 1.41    |
| angular_gyrus            | 4.38E-03     | 37  | 26.74 | 1.38    |
| HepG2                    | 1.12E-02     | 29  | 20.99 | 1.38    |

**Supplementary Table 8. Number of markers in strong LD ( $r^2 \geq 0.8$ ) with the most significant marker of each novel locus that overlap with enhancers in different cell/tissue types.**

| Novel loci (GRCh37) | Nearby genes               | Th17 | CD8+ (naive) | Th0 | Th2 |
|---------------------|----------------------------|------|--------------|-----|-----|
| chr1:78450517       | <i>FUBP1</i>               | 1    | 0            | 0   | 0   |
| chr1:172675097      | <i>FASLG</i>               | 4    | 0            | 1   | 1   |
| chr1:206655331      | <i>IKBKE</i>               | 0    | 0            | 0   | 0   |
| chr10:64369999      | <i>ZNF365</i>              | 1    | 0            | 1   | 0   |
| chr10:89824771      | <i>PTEN, KLLN, SNORD74</i> | 1    | 1            | 0   | 0   |
| chr10:102038641     | <i>CHUK</i>                | 2    | 2            | 1   | 1   |
| chr11:65593444      | <i>CFL1, FIBP, FOSL1</i>   | 0    | 0            | 0   | 0   |
| chr12:10597207      | <i>KLRK1, KLRC4</i>        | 0    | 7            | 0   | 0   |
| chr12:112059557     | <i>BRAP, MAPKAPK5</i>      | 2    | 0            | 2   | 2   |
| chr12:122668326     | <i>IL31</i>                | 0    | 0            | 1   | 7   |
| chr13:99950260      | <i>UBAC2, RN7SKP9</i>      | 19   | 17           | 14  | 18  |
| chr14:98668778:D    | <i>RP11-61O1.1</i>         | 6    | 5            | 7   | 7   |
| chr15:31637666      | <i>KLF13</i>               | 4    | 4            | 4   | 4   |
| chr17:73890363      | <i>TRIM47, TRIM65</i>      | 11   | 7            | 10  | 6   |
| chr18:12857002      | <i>PTPN2</i>               | 0    | 0            | 1   | 1   |
| chr19:49206417      | <i>FUT2</i>                | 0    | 0            | 0   | 0   |

| Novel loci (GRCh37) | Nearby genes               | HSMM | Inferior temporal lobe | K562 | Kidney | Liver | Mid-frontal lobe | NH osteoblast | Pancreatic Islets | Substantia nigra |
|---------------------|----------------------------|------|------------------------|------|--------|-------|------------------|---------------|-------------------|------------------|
| chr1:78450517       | <i>FUBP1</i>               | 1    | 1                      | 0    | 1      | 0     | 0                | 1             | 1                 | 0                |
| chr1:172675097      | <i>FASLG</i>               | 0    | 0                      | 0    | 0      | 0     | 0                | 0             | 0                 | 0                |
| chr1:206655331      | <i>IKBKE</i>               | 0    | 0                      | 0    | 0      | 0     | 0                | 0             | 0                 | 0                |
| chr10:64369999      | <i>ZNF365</i>              | 3    | 0                      | 0    | 0      | 0     | 0                | 2             | 1                 | 1                |
| chr10:89824771      | <i>PTEN, KLLN, SNORD74</i> | 0    | 1                      | 0    | 1      | 1     | 1                | 0             | 1                 | 1                |
| chr10:102038641     | <i>CHUK</i>                | 2    | 1                      | 1    | 2      | 1     | 1                | 1             | 4                 | 1                |
| chr11:65593444      | <i>CFL1, FIBP, FOSL1</i>   | 0    | 0                      | 0    | 0      | 0     | 0                | 0             | 0                 | 0                |
| chr12:10597207      | <i>KLRK1, KLRC4</i>        | 0    | 3                      | 0    | 0      | 0     | 0                | 0             | 0                 | 0                |
| chr12:112059557     | <i>BRAP, MAPKAPK5</i>      | 3    | 5                      | 5    | 4      | 3     | 5                | 4             | 7                 | 5                |
| chr12:122668326     | <i>IL31</i>                | 3    | 0                      | 0    | 0      | 0     | 0                | 3             | 0                 | 1                |
| chr13:99950260      | <i>UBAC2, RN7SKP9</i>      | 5    | 2                      | 5    | 8      | 11    | 4                | 9             | 7                 | 7                |
| chr14:98668778:D    | <i>RP11-6101.1</i>         | 0    | 0                      | 0    | 0      | 0     | 0                | 0             | 0                 | 0                |
| chr15:31637666      | <i>KLF13</i>               | 2    | 4                      | 1    | 4      | 4     | 4                | 0             | 4                 | 4                |
| chr17:73890363      | <i>TRIM47, TRIM65</i>      | 6    | 11                     | 5    | 9      | 9     | 11               | 6             | 11                | 11               |
| chr18:12857002      | <i>PTPN2</i>               | 0    | 0                      | 0    | 0      | 0     | 0                | 0             | 0                 | 0                |
| chr19:49206417      | <i>FUT2</i>                | 0    | 0                      | 0    | 0      | 0     | 0                | 0             | 0                 | 0                |

| Novel loci (GRCh37) | Nearby genes                                   | Adipose | Angular gyrus | Anterior caudate | Chondrogenic diff | Cingulate gyrus | Colonic mucosa | Duodenum mucosa | HepG2 | Hippocampus middle |
|---------------------|------------------------------------------------|---------|---------------|------------------|-------------------|-----------------|----------------|-----------------|-------|--------------------|
| chr1:78450517       | <i>FUBP1</i>                                   | 0       | 0             | 1                | 1                 | 1               | 0              | 0               | 1     | 1                  |
| chr1:172675097      | <i>FASLG</i>                                   | 0       | 0             | 0                | 0                 | 0               | 0              | 0               | 0     | 0                  |
| chr1:206655331      | <i>IKBKE</i>                                   | 0       | 0             | 0                | 0                 | 0               | 0              | 0               | 0     | 0                  |
| chr10:64369999      | <i>ZNF365</i>                                  | 0       | 0             | 0                | 0                 | 0               | 0              | 0               | 0     | 1                  |
| chr10:89824771      | <i>PTEN,</i><br><i>KLLN,</i><br><i>SNORD74</i> | 1       | 1             | 1                | 0                 | 1               | 1              | 1               | 0     | 1                  |
| chr10:102038641     | <i>CHUK</i>                                    | 3       | 1             | 1                | 1                 | 1               | 2              | 1               | 2     | 1                  |
| chr11:65593444      | <i>CFL1, FIBP,</i><br><i>FOSL1</i>             | 0       | 0             | 0                | 0                 | 0               | 0              | 0               | 0     | 0                  |
| chr12:10597207      | <i>KLRK1,</i><br><i>KLRC4</i>                  | 0       | 0             | 3                | 5                 | 0               | 0              | 0               | 1     | 0                  |
| chr12:112059557     | <i>BRAP,</i><br><i>MAPKAPK5</i>                | 3       | 5             | 6                | 3                 | 5               | 4              | 2               | 1     | 4                  |
| chr12:122668326     | <i>IL31</i>                                    | 0       | 0             | 0                | 3                 | 0               | 0              | 0               | 0     | 1                  |
| chr13:99950260      | <i>UBAC2,</i><br><i>RN7SKP9</i>                | 9       | 2             | 9                | 3                 | 6               | 13             | 10              | 2     | 10                 |
| chr14:98668778:D    | <i>RP11-6101.1</i>                             | 0       | 0             | 1                | 0                 | 0               | 0              | 0               | 0     | 0                  |
| chr15:31637666      | <i>KLF13</i>                                   | 4       | 4             | 4                | 0                 | 4               | 4              | 4               | 0     | 4                  |
| chr17:73890363      | <i>TRIM47,</i><br><i>TRIM65</i>                | 10      | 11            | 11               | 10                | 11              | 10             | 9               | 10    | 12                 |
| chr18:12857002      | <i>PTPN2</i>                                   | 0       | 0             | 1                | 0                 | 0               | 0              | 0               | 0     | 0                  |
| chr19:49206417      | <i>FUT2</i>                                    | 0       | 0             | 0                | 0                 | 0               | 0              | 0               | 0     | 0                  |

**Supplementary Table 9. Drugs targeting genes from the susceptibility loci**

| Locus             | Gene Target    | DrugBank                                                                                                                                              | PharmGKB                                                                                                    |
|-------------------|----------------|-------------------------------------------------------------------------------------------------------------------------------------------------------|-------------------------------------------------------------------------------------------------------------|
| <b>Novel Loci</b> |                |                                                                                                                                                       |                                                                                                             |
| chr1:78450517     | <i>FUBP1</i>   | MGI-114                                                                                                                                               | NA                                                                                                          |
| chr10:89824771    | <i>PTEN</i>    | NA                                                                                                                                                    | carboplatin; cisplatin                                                                                      |
| chr10:102038641   | <i>CHUK</i>    | Aminosalicylic Acid; Mesalazine; Acetylcysteine; Sulfasalazine                                                                                        | NA                                                                                                          |
| chr11:65593444    | <i>CFL1</i>    | Lauryl Dimethylamine-N-Oxide                                                                                                                          | NA                                                                                                          |
| chr17:73890363    | <i>ACOX1</i>   | (3R)-3-HYDROXYDODECANOIC ACID; Flavin adenine dinucleotide                                                                                            | NA                                                                                                          |
| chr19:49206417    | <i>BCAT2</i>   | Pyridoxal Phosphate; N-[O-Phosphono-Pyridoxyl]-Isoleucine; Pyridoxamine-5'-Phosphate; Alpha-ketoisovalerate; L-Leucine; L-Glutamic Acid; L-Isoleucine | NA                                                                                                          |
| chr19:49206417    | <i>CA11</i>    | Zonisamide                                                                                                                                            | NA                                                                                                          |
| <b>known loci</b> |                |                                                                                                                                                       |                                                                                                             |
| chr1:67726104     | <i>IL23R</i>   | NA                                                                                                                                                    | celecoxib                                                                                                   |
| chr2:163260691    | <i>KCNH7</i>   | Terazosin; Ibutilide; Miconazole; Doxazosin; Prazosin                                                                                                 | NA                                                                                                          |
| chr2:163260691    | <i>GCA</i>     | Guanosine-5'-Diphosphate                                                                                                                              | NA                                                                                                          |
| chr5:96119273     | <i>CAST</i>    | Calcium                                                                                                                                               | NA                                                                                                          |
| chr5:131996445    | <i>IL4</i>     | NA                                                                                                                                                    | aspirin                                                                                                     |
| chr5:150467189    | <i>GPX3</i>    | Glutathione                                                                                                                                           | NA                                                                                                          |
| chr5:158829527    | <i>IL12B</i>   | 5-Mercapto-2-Nitro-Benzoic Acid; CNTO 1275; ABT-874; humanized SMART Anti-IL-12 Antibody                                                              | NA                                                                                                          |
| chr6:31266090     | <i>HLA-C</i>   | NA                                                                                                                                                    | ustekinumab; lamotrigine; methazolamide; phenytoin                                                          |
| chr6:31266090     | <i>HLA-B</i>   | N-Formylmethionine                                                                                                                                    | trichloroethylene; interferons; flucloxacillin; acetazolamide; clozapine; dapsone; methazolamide; ribavirin |
| chr6:111913262    | <i>FYN</i>     | Dasatinib; 1-Methoxy-2-[2-(2-Methoxy-Ethoxy)-Ethane                                                                                                   | NA                                                                                                          |
| chr6:138197824    | <i>TNFAIP3</i> | NA                                                                                                                                                    | methotrexate                                                                                                |
| chr9:32523737     | <i>NDUFB6</i>  | NADH                                                                                                                                                  | NA                                                                                                          |
| chr10:75599127    | <i>CAMK2G</i>  | 1-tert-butyl-3-(3-methylbenzyl)-1H-pyrazolo[3,4-d]pyrimidin-4-amine; Bosutinib                                                                        | NA                                                                                                          |

|                |         |                                                                                                                                                                                                                                                                                                                                                                                                                                                                                                                                                                                                                                                                                                                                                                                                                                                                                                                                                                                                                                                                                                                                                                                                                                                                                                                                                                                                                                                                                                                                                                                                                                                                                                                                                                                                                                                                                                                                                                                    |                                     |
|----------------|---------|------------------------------------------------------------------------------------------------------------------------------------------------------------------------------------------------------------------------------------------------------------------------------------------------------------------------------------------------------------------------------------------------------------------------------------------------------------------------------------------------------------------------------------------------------------------------------------------------------------------------------------------------------------------------------------------------------------------------------------------------------------------------------------------------------------------------------------------------------------------------------------------------------------------------------------------------------------------------------------------------------------------------------------------------------------------------------------------------------------------------------------------------------------------------------------------------------------------------------------------------------------------------------------------------------------------------------------------------------------------------------------------------------------------------------------------------------------------------------------------------------------------------------------------------------------------------------------------------------------------------------------------------------------------------------------------------------------------------------------------------------------------------------------------------------------------------------------------------------------------------------------------------------------------------------------------------------------------------------------|-------------------------------------|
| chr10:75599127 | PLAU    | 6-[(Z)-Amino(Imino)Methyl]-N-[4-(Aminomethyl)Phenyl]-4-(Pyrimidin-2-Ylamino)-2-Naphthamide; 6-[N-(1-Isopropyl-3,4-Dihydro-7-Isoquinolinyl)Carbamyl]-2-Naphthalenecarboxamidine; 6-[N-(4-(Aminomethyl)Phenyl)Carbamyl]-2-Naphthalenecarboxamidine; Trans-6-(2-Phenylcyclopropyl)-Naphthalene-2-Carboxamidine; 6-[N-(1-Isopropyl-1,2,3,4-Tetrahydro-7-Isoquinolinyl)Carbamyl]-2-Naphthalenecarboxamidine; 6-Chloro-2-(2-Hydroxy-Biphenyl-3-Yl)-1h-Indole-5-Carboxamidine; 1-[4-(2-oxo-2-phenylethyl)phenyl]guanidine; (2R)-1-(2,6-dimethylphenoxy)propan-2-amine; 6-[N-(4-Ethyl-1,2,3,4-Tetrahydro-6-Isoquinolinyl)Carbamyl]-2-Naphthalenecarboxamidine; CRA_8696; 8-(Pyrimidin-2-Ylamino)Naphthalene-2-Carboximidamide; Plasmin; 4-(2-aminoethoxy)-N-(3-chloro-5-piperidin-1-ylphenyl)-3,5-dimethylbenzamide; 4-(2-aminoethoxy)-N-(2,5-diethoxyphenyl)-3,5-dimethylbenzamide; 4-(2-aminoethoxy)-N-(3-chloro-2-ethoxy-5-piperidin-1-ylphenyl)-3,5-dimethylbenzamide; 2-(2-HYDROXY-BIPHENYL)-1H-BENZOIMIDAZOLE-5-CARBOXAMIDINE; 6-FLUORO-2-(2-HYDROXY-3-ISOBUTOXY-PHENYL)-1H-BENZOIMIDAZOLE-5-CARBOXAMIDINE; 6-FLUORO-2-[2-HYDROXY-3-(2-METHYL-CYCLOHEXYLOXY)-PHENYL]-1H-INDOLE-5-CARBOXAMIDINE; N-(4-CARBAMIMIDOYL-3-CHORO-PHENYL)-2-HYDROXY-3-iodo-5-METHYL-BENZAMIDE; 6-[(Z)-AMINO(IMINO)METHYL]-N-[3-(CYCLOPENTYLOXY)PHENYL]-2-NAPHTHAMIDE; Urokinase; 2-(2-Hydroxy-5-Methoxy-Phenyl)-1h-Benzoimidazole-5-Carboxamidine; Thieno[2,3-B]Pyridine-2-Carboxamidine; Benzamidine; CRA_10655; [2,4,6-Triisopropyl-Phenylsulfonyl-L-[3-Amidino-Phenylalanine]]-Piperazine-N'-Beta-Alanine; 4-Iodobenzo[B]Thiophene-2-Carboxamidine; 7-Methoxy-8-[1-(Methylsulfonyl)-1h-Pyrazol-4-Yl]Naphthalene-2-Carboximidamide; 4-(2-AMINOETHOXY)-3,5-DICHLORO-N-[3-(1-METHYLETHOXY)PHENYL]BENZAMIDE; 2-Amino-5-Hydroxy-Benzimidazole; Amiloride; 2-(2-Hydroxy-Phenyl)-1h-Benzoimidazole-5-Carboxamidine; N-(1-Adamantyl)-N'-(4-Guanidinobenzyl)Urea; 6-(N-Phenylcarbamyl)-2-Naphthalenecarboxamidine | NA                                  |
| chr10:81032532 | PPIF    | L-Proline; Cyclosporine; 7-AMINO-4-METHYL-CHROMEN-2-ONE; 1-Methoxy-2-[2-(2-Methoxy-Ethoxy)-Ethane                                                                                                                                                                                                                                                                                                                                                                                                                                                                                                                                                                                                                                                                                                                                                                                                                                                                                                                                                                                                                                                                                                                                                                                                                                                                                                                                                                                                                                                                                                                                                                                                                                                                                                                                                                                                                                                                                  | NA                                  |
| chr11:64135298 | ESRRA   | Troglitazone; 1-CYCLOHEXYL-N-[[1-(4-METHYLPHENYL)-1H-INDOL-3-YL]METHYL]METHANAMINE                                                                                                                                                                                                                                                                                                                                                                                                                                                                                                                                                                                                                                                                                                                                                                                                                                                                                                                                                                                                                                                                                                                                                                                                                                                                                                                                                                                                                                                                                                                                                                                                                                                                                                                                                                                                                                                                                                 | NA                                  |
| chr11:64135298 | PRDX5   | Diminazene; Auranofin; Benzoic Acid                                                                                                                                                                                                                                                                                                                                                                                                                                                                                                                                                                                                                                                                                                                                                                                                                                                                                                                                                                                                                                                                                                                                                                                                                                                                                                                                                                                                                                                                                                                                                                                                                                                                                                                                                                                                                                                                                                                                                | NA                                  |
| chr11:64135298 | RPS6KA4 | Riboflavin Monophosphate                                                                                                                                                                                                                                                                                                                                                                                                                                                                                                                                                                                                                                                                                                                                                                                                                                                                                                                                                                                                                                                                                                                                                                                                                                                                                                                                                                                                                                                                                                                                                                                                                                                                                                                                                                                                                                                                                                                                                           | NA                                  |
| chr11:64135298 | BAD     | ABT-263                                                                                                                                                                                                                                                                                                                                                                                                                                                                                                                                                                                                                                                                                                                                                                                                                                                                                                                                                                                                                                                                                                                                                                                                                                                                                                                                                                                                                                                                                                                                                                                                                                                                                                                                                                                                                                                                                                                                                                            | NA                                  |
| chr12:56750204 | IL23A   | ABT-874                                                                                                                                                                                                                                                                                                                                                                                                                                                                                                                                                                                                                                                                                                                                                                                                                                                                                                                                                                                                                                                                                                                                                                                                                                                                                                                                                                                                                                                                                                                                                                                                                                                                                                                                                                                                                                                                                                                                                                            | NA                                  |
| chr12:56750204 | CS      | Nitromethyldehia Coenzyme A; Oxaloacetate Ion; Trifluoroacetylonyl Coenzyme A; Alpha-Fluoro-Carboxymethyldehia Coenzyme a Complex; Malate Ion; Coenzyme A; Citric Acid                                                                                                                                                                                                                                                                                                                                                                                                                                                                                                                                                                                                                                                                                                                                                                                                                                                                                                                                                                                                                                                                                                                                                                                                                                                                                                                                                                                                                                                                                                                                                                                                                                                                                                                                                                                                             | NA                                  |
| chr14:35832666 | NFKBIA  | Acetylsalicylic acid                                                                                                                                                                                                                                                                                                                                                                                                                                                                                                                                                                                                                                                                                                                                                                                                                                                                                                                                                                                                                                                                                                                                                                                                                                                                                                                                                                                                                                                                                                                                                                                                                                                                                                                                                                                                                                                                                                                                                               | NA                                  |
| chr14:35832666 | PSMA6   | (3AR,6R,6AS)-6-((S)-((S)-CYCLOHEX-2-ENYL)(HYDROXY)METHYL)-6A-METHYL-4-OXO-HEXAHYDRO-2H-FURO[3,2-C]PYRROLE-6-CARBALDEHYDE; N-((1R)-1-(DIHYDROXYBORYL)-3-METHYLBUTYL)-N-(PYRAZIN-2-YLCARBONYL)-L-PHENYLALANINAMIDE                                                                                                                                                                                                                                                                                                                                                                                                                                                                                                                                                                                                                                                                                                                                                                                                                                                                                                                                                                                                                                                                                                                                                                                                                                                                                                                                                                                                                                                                                                                                                                                                                                                                                                                                                                   | NA                                  |
| chr16:31004812 | PRSS53  | NA                                                                                                                                                                                                                                                                                                                                                                                                                                                                                                                                                                                                                                                                                                                                                                                                                                                                                                                                                                                                                                                                                                                                                                                                                                                                                                                                                                                                                                                                                                                                                                                                                                                                                                                                                                                                                                                                                                                                                                                 | warfarin; phenprocoumon; fluindione |

|                |               |                                                                                                                                                                                                                                                                                                                                                                                                                                                                                                                                                                                                                                                                                                                                                                                                                                                                                                                                                                                                                                                                                                                                                                                                                                                                                                                                                                                                                                                                                                                                                                                                                                                                                                                                                     |                                  |
|----------------|---------------|-----------------------------------------------------------------------------------------------------------------------------------------------------------------------------------------------------------------------------------------------------------------------------------------------------------------------------------------------------------------------------------------------------------------------------------------------------------------------------------------------------------------------------------------------------------------------------------------------------------------------------------------------------------------------------------------------------------------------------------------------------------------------------------------------------------------------------------------------------------------------------------------------------------------------------------------------------------------------------------------------------------------------------------------------------------------------------------------------------------------------------------------------------------------------------------------------------------------------------------------------------------------------------------------------------------------------------------------------------------------------------------------------------------------------------------------------------------------------------------------------------------------------------------------------------------------------------------------------------------------------------------------------------------------------------------------------------------------------------------------------------|----------------------------------|
| chr16:31004812 | <i>VKORC1</i> | Warfarin; Menadione; Acenocoumarol; Dicoumarol; Phenindione; Phenprocoumon                                                                                                                                                                                                                                                                                                                                                                                                                                                                                                                                                                                                                                                                                                                                                                                                                                                                                                                                                                                                                                                                                                                                                                                                                                                                                                                                                                                                                                                                                                                                                                                                                                                                          | fluidione; coumarin              |
| chr16:31004812 | <i>STX4</i>   | NA                                                                                                                                                                                                                                                                                                                                                                                                                                                                                                                                                                                                                                                                                                                                                                                                                                                                                                                                                                                                                                                                                                                                                                                                                                                                                                                                                                                                                                                                                                                                                                                                                                                                                                                                                  | warfarin; phenprocoumon          |
| chr17:26124908 | <i>NOS2</i>   | Aminoguanidine; S-Ethylisothiourea; (3R)-3-[[1,2,3,4-tetrahydroisoquinolin-7-yloxy)methyl]-2,3-dihydrothieno[2,3-f][1,4]oxazepin-5-amine; 1-(6-CYANO-3-PYRIDYLCARBONYL)-5',8'-DIFLUOROSPIRO[PIPERIDINE-4,2'(1'H)-QUINAZOLINE]-4'-AMINE; KD7040; N,N-dimethylarginine; L-Citrulline; 7-Nitroindazole; 4r-Fluoro-N6-Ethanimidoyl-L-Lysine; N-[2-(4-AMINO-5,8-DIFLUORO-1,2-DIHYDROQUINAZOLIN-2-YL)ETHYL]-3-FURAMIDE; ACCLAIM; Ethylisothiourea; N-(3-(Aminomethyl)Benzyl)Acetamide; 4-(1,3-BENZODIOXOL-5-YLOXY)-2-[4-(1H-IMIDAZOL-1-YL)PHENOXY]-6-METHYLPYRIMIDINE; (3S)-1-(1,3-BENZODIOXOL-5-YLMETHYL)-3-[4-(1H-IMIDAZOL-1-YL)PHENOXY]PIPERIDINE; 7,8-Dihydro-L-Biopterin; 5-(4'-AMINO-1'-ETHYL-5',8'-DIFLUORO-1'H-SPIRO[PIPERIDINE-4,2'-QUINAZOLINE]-1-YLCARBONYL)PICOLINONITRILE; 4-(1H-IMIDAZOL-1-YL)PHENOL; Dexamethasone; N-[2-(1,3-BENZODIOXOL-5-YL)ETHYL]-1-[2-(1H-IMIDAZOL-1-YL)-6-METHYLPYRIMIDIN-4-YL]-D-PROLINAMIDE; N-[2-(6-AMINO-4-METHYLPYRIDIN-2-YL)ETHYL]-4-CYANOBENZAMIDE; ETHYL 4-[(4-METHYLPYRIDIN-2-YL)AMINO]PIPERIDINE-1-CARBOXYLATE; L-Thiocitrulline; Thiocoumarin; 1-[4-(AMINOMETHYL)BENZOYL]-5'-FLUORO-1'H-SPIRO[PIPERIDINE-4,2'-QUINAZOLIN]-4'-AMINE; (6r,1'r,2's)-5,6,7,8-Tetrahydrobiopterin; N-(4-(2-((3-Chlorophenylmethyl)Amino)Ethyl)Phenyl)-2-Thiophecboxamide; 6-Nitroindazole; L-Arginine; N-Omega-Hydroxy-L-Arginine; ETHYL 4-[(4-CHLOROPYRIDIN-2-YL)AMINO]PIPERIDINE-1-CARBOXYLATE; 7,8-Dihydrobiopterin; 5-Nitroindazole; Miconazole; N-Omega-Propyl-L-Arginine; 4-({4-[(4-methoxypyridin-2-yl)amino]piperidin-1-yl}carbonyl)benzotrile; (2S)-2-methyl-2,3-dihydrothieno[2,3-f][1,4]oxazepin-5-amine; 4-(1,3-BENZODIOXOL-5-YLOXY)-2-[4-(1H-IMIDAZOL-1-YL)PHENOXY]PYRIMIDINE; Triflusal; 3-Bromo-7-Nitroindazole | isoniazid; rifampin; doxorubicin |
| chr17:40561579 | <i>STAT3</i>  | NA                                                                                                                                                                                                                                                                                                                                                                                                                                                                                                                                                                                                                                                                                                                                                                                                                                                                                                                                                                                                                                                                                                                                                                                                                                                                                                                                                                                                                                                                                                                                                                                                                                                                                                                                                  | interferons                      |
| chr17:78178893 | <i>GAA</i>    | Acarbose; AT2220; Miglitol                                                                                                                                                                                                                                                                                                                                                                                                                                                                                                                                                                                                                                                                                                                                                                                                                                                                                                                                                                                                                                                                                                                                                                                                                                                                                                                                                                                                                                                                                                                                                                                                                                                                                                                          | NA                               |
| chr19:10463118 | <i>TYK2</i>   | 3-((3R,4R)-4-methyl-3-[methyl(7H-pyrrolo[2,3-d]pyrimidin-4-yl)amino]piperidin-1-yl)-3-oxopropanenitrile; 2-(1,1-DIMETHYLETHYL)9-FLUORO-3,6-DIHYDRO-7H-BENZ[H]-IMIDAZ[4,5-F]ISOQUINOLIN-7-ONE                                                                                                                                                                                                                                                                                                                                                                                                                                                                                                                                                                                                                                                                                                                                                                                                                                                                                                                                                                                                                                                                                                                                                                                                                                                                                                                                                                                                                                                                                                                                                        | NA                               |
| chr19:10463118 | <i>ICAM1</i>  | Hyaluronan; Natalizumab                                                                                                                                                                                                                                                                                                                                                                                                                                                                                                                                                                                                                                                                                                                                                                                                                                                                                                                                                                                                                                                                                                                                                                                                                                                                                                                                                                                                                                                                                                                                                                                                                                                                                                                             | NA                               |
| chr19:10463118 | <i>PDE4A</i>  | PDE4; Theophylline; AN2728; Dyphylline; Roflumilast; 4-[8-(3-nitrophenyl)-1,7-naphthyridin-6-yl]benzoic acid; Iloprost; Enprofylline; Drotaverine; Pentoxifylline; Oxtriphylline; Piclamilast; Ibudilast; (4R)-4-(3-butoxy-4-methoxybenzyl)imidazolidin-2-one; Tofisopam; Ketotifen; Dipyrindamole                                                                                                                                                                                                                                                                                                                                                                                                                                                                                                                                                                                                                                                                                                                                                                                                                                                                                                                                                                                                                                                                                                                                                                                                                                                                                                                                                                                                                                                  | NA                               |



## Supplementary Note

### Annotated functions of notable candidate genes within newly identified psoriasis susceptibility loci

**FUBP1 (1p31.1):** *FUBP1* encodes a single stranded DNA-binding protein that modulates c-Myc mRNA levels. As a transcription factor c-Myc controls the expression of about 10% of cellular genes, including those essential for cell proliferation, differentiation and apoptosis<sup>5-8</sup>. *FUBP1* also directly represses the cell cycle inhibitor p21<sup>9</sup>, which also plays an important role in myeloid cell differentiation with loss of p21 inhibiting both DC and macrophage differentiation<sup>10</sup>.

**FASLG (1q24.3):** *FASLG* encodes Fas ligand (CD95), a type-II transmembrane protein that belongs to the tumor necrosis factor (TNF) family. Fas ligand/receptor interactions play an important role in the regulation of the immune system<sup>11</sup>. Although apoptosis is the most studied outcome of Fas:Fas ligand binding<sup>11</sup>, Fas receptor engagement includes promotion of inflammatory responses in cell such as macrophages<sup>12</sup>, dendritic cells<sup>13,14</sup>, and keratinocytes<sup>15</sup>. The Fas:Fas ligand system may interact with NF- $\kappa$ B via A20 (*TNFAIP3*)<sup>16</sup>, a known risk gene for psoriasis<sup>1</sup>.

**IKBKE (1q32.1):** *IKBKE* encodes IKK $\epsilon$ , which belongs to the I $\kappa$ B kinase family, and is essential for regulation of antiviral signaling pathways. IKK $\epsilon$  is activated downstream of cytosolic RNA/DNA sensors, and mediates phosphorylation and activation of transcription factors, including IRF3 and IRF7, and NF- $\kappa$ B<sup>17-19</sup>.

**ZNF365 (10q21.2):** *ZNF365* encodes a zinc-finger binding protein. It is induced by DNA double-strand breakage and is involved in the homologous recombination pathway and maintains genome integrity during DNA replication. It has been reported to be a susceptibility locus for Crohn's disease<sup>20</sup>, and atopic dermatitis<sup>21</sup>.

**PTEN, KLLN, (10q23.31):** *PTEN* is a tumor suppressor that inhibits cell proliferation through inactivation of the PI3 kinase/Akt pathway. Keratinocyte-specific Pten deficiency in mice results in epidermal hyperplasia and hyperkeratosis<sup>22</sup>. *PTEN* has been reported to be suppressed in psoriatic skin compared to normal skin<sup>23</sup>. *KLLN* is a high-affinity DNA-binding protein, downstream of p53 and necessary for p53-induced apoptosis<sup>24</sup>.

**CHUK (10q24.31):** *CHUK* encodes IKK1/IKK $\alpha$ . It is one of three core proteins of the IKK complex and has a critical role in regulating NF- $\kappa$ B activity. It has been reported to have an important role in inflammatory responses<sup>25,26</sup> and epidermal differentiation<sup>27</sup>.

**CFL1, FIBP, FOSL1 (11q13.1):** *CFL1* encodes for cofilin, which is a widely distributed intracellular actin-modulating protein and may have a role in regulating dendritic and T-cell migration and T-cell activation<sup>28,29</sup>. *FIBP* encodes for acidic fibroblast growth factor (aFGF) intracellular binding protein. It is mainly found in the nucleus and thought to be involved in the intracellular function of aFGF<sup>30</sup>. *FOSL1* is a member of the AP-1 transcription factor and has been shown to have a role in endothelial assembly into capillary tubes<sup>31</sup>.

**KLRK1, KLRC4 (12p13.2):** *KLRK1* encodes NKG2D, a killer cell lectin-like receptor. It is an activating receptor that triggers natural killer (NK) cell CD8+ T-cells, but is normally absent from CD4+ T-cells. NKG2D is also present on most gamma-delta T-cells. Its ligands are stress induced proteins such as MICA<sup>32</sup>. *KLRC4* encodes NKG2F. It is expressed intracellularly in NK cells but is unable to bind with CD94 and has been thought to be a vestigial gene product<sup>33</sup>.

**BRAP, MAPKAPK5 (12q24.12):** *BRAP* may function as a cytoplasmic retention protein and play a role in the cytoplasmic translocation of p21<sup>34</sup>. *MAPKAP5* encodes a protein kinase regulated by p38. It is activated in response to cellular stress and pro-inflammatory cytokines<sup>35</sup> and is involved in tumor suppression, cell motility and cell cycle regulation<sup>36</sup>.

**IL31 (12q24.31):** *IL31* encodes IL-31, which is a member of the IL-6 cytokine family. It is thought to be mainly a Th2– derived cytokine that has been implicated in the pathogenesis of atopic dermatitis<sup>37</sup> and promotes Th2-driven inflammation<sup>38</sup>.

**UBAC2 (13q32.3):** *UBAC2* has an ubiquitin-associated domain and is predicted to be involved in ubiquitination processes<sup>39</sup>. Polymorphisms in this gene have been associated with Bechet’s disease<sup>39</sup> and cutaneous basal and squamous cell carcinoma<sup>40</sup>. The function of the protein encoded by *UBAC2* is not known.

**RP11-6101.1 (14q32.2):** *RP11-6101.1* encodes a novel lincRNA., whose function is currently unknown.

**KLF13 (15q13.3):** *KLF13* encodes for Kruppel-like factor 13, and belongs to a family of transcription factors that have C2H2 motif. *KLF13* is the dominant regulator of the chemokine RANTES (CCL5) in T-cells<sup>41</sup> and has a role in regulating IL-4 expression in CD4+T-cells<sup>42</sup>.

**TRIM47, TRIM65 (17q25.1):** *TRIM47* and *TRIM65* encode tripartite motif-containing protein 47 and 65.. Over 60 TRIM proteins are known and many of these are induced by type I and type II interferons and play a crucial role in pathogen-recognition and anti-viral responses<sup>43</sup>. Members of the TRIM family interact with RIG1/DDX58 a previously implicated risk gene for psoriasis<sup>4</sup>.

**PTPN2 (18p11.21):** *PTPN2* encodes protein-tyrosine phosphatase, T-cell. *PTPN2* has various roles in T-cell biology. Loss of *PTPN2* in the T-cell compartment leads to enhanced induction of Th1 and Th17 cells along with impaired induction of regulatory T-cells<sup>44</sup>. *PTPN2* is a critical mediator of peripheral tolerance by restraining CD8+ T-cell responses after antigen-cross-presentation<sup>45</sup>.

**FUT2 (19q13.33):** *FUT2* encodes alpha – (1,2) fucosyltransferase with has a role in glycosylation of proteins. It regulates expression of the Lewis ABO blood group antigens on the surface of epithelial cells<sup>46</sup> and determines the secretion status of the ABO antigens. Risk variants in *FUT2* have been associated with Crohn’s disease<sup>47,48</sup>.

## Supplementary References

1. Nair, R.P. *et al.* Genome-wide scan reveals association of psoriasis with IL-23 and NF-kappaB pathways. *Nat Genet* **41**, 199-204 (2009).
2. Ellinghaus, E. *et al.* Genome-wide association study identifies a psoriasis susceptibility locus at TRAF3IP2. *Nat Genet* **42**, 991-5 (2010).
3. Strange, A. *et al.* A genome-wide association study identifies new psoriasis susceptibility loci and an interaction between HLA-C and ERAP1. *Nat Genet* **42**, 985-90 (2010).
4. Tsoi, L.C. *et al.* Identification of 15 new psoriasis susceptibility loci highlights the role of innate immunity. *Nat Genet* **44**, 1341-8 (2012).
5. de Nigris, F. *et al.* c-Myc oncoprotein: cell cycle-related events and new therapeutic challenges in cancer and cardiovascular diseases. *Cell Cycle* **2**, 325-8 (2003).
6. Hoffman, B. & Liebermann, D.A. Apoptotic signaling by c-MYC. *Oncogene* **27**, 6462-72 (2008).
7. Levens, D. Disentangling the MYC web. *Proc Natl Acad Sci U S A* **99**, 5757-9 (2002).
8. Pelengaris, S., Khan, M. & Evan, G. c-MYC: more than just a matter of life and death. *Nat Rev Cancer* **2**, 764-76 (2002).
9. Rabenhorst, U. *et al.* Overexpression of the far upstream element binding protein 1 in hepatocellular carcinoma is required for tumor growth. *Hepatology* **50**, 1121-9 (2009).
10. Kramer, J.L., Baltathakis, I., Alcantara, O.S. & Boldt, D.H. Differentiation of functional dendritic cells and macrophages from human peripheral blood monocyte precursors is dependent on expression of p21 (WAF1/CIP1) and requires iron. *Br J Haematol* **117**, 727-34 (2002).
11. Cullen, S.P. & Martin, S.J. Fas and TRAIL 'death receptors' as initiators of inflammation: Implications for cancer. *Semin Cell Dev Biol* (2015).
12. Park, D.R. *et al.* Fas (CD95) induces proinflammatory cytokine responses by human monocytes and monocyte-derived macrophages. *J Immunol* **170**, 6209-16 (2003).
13. Guo, Z., Zhang, M., Tang, H. & Cao, X. Fas signal links innate and adaptive immunity by promoting dendritic-cell secretion of CC and CXC chemokines. *Blood* **106**, 2033-41 (2005).
14. Rescigno, M. *et al.* Fas engagement induces the maturation of dendritic cells (DCs), the release of interleukin (IL)-1beta, and the production of interferon gamma in the absence of IL-12 during DC-T cell cognate interaction: a new role for Fas ligand in inflammatory responses. *J Exp Med* **192**, 1661-8 (2000).
15. Farley, S.M. *et al.* Fas ligand elicits a caspase-independent proinflammatory response in human keratinocytes: implications for dermatitis. *J Invest Dermatol* **126**, 2438-51 (2006).
16. Malewicz, M., Zeller, N., Yilmaz, Z.B. & Weih, F. NF kappa B controls the balance between Fas and tumor necrosis factor cell death pathways during T cell receptor-induced apoptosis via the expression of its target gene A20. *J Biol Chem* **278**, 32825-33 (2003).
17. Sharma, S. *et al.* Triggering the interferon antiviral response through an IKK-related pathway. *Science* **300**, 1148-51 (2003).
18. Fitzgerald, K.A. *et al.* IKKepsilon and TBK1 are essential components of the IRF3 signaling pathway. *Nat Immunol* **4**, 491-6 (2003).
19. Mattioli, I. *et al.* Inducible phosphorylation of NF-kappa B p65 at serine 468 by T cell costimulation is mediated by IKK epsilon. *J Biol Chem* **281**, 6175-83 (2006).
20. Yang, S.K. *et al.* Immunochip analysis identification of 6 additional susceptibility loci for Crohn's disease in Koreans. *Inflamm Bowel Dis* **21**, 1-7 (2015).
21. Hirota, T. *et al.* Genome-wide association study identifies eight new susceptibility loci for atopic dermatitis in the Japanese population. *Nat Genet* **44**, 1222-6 (2012).

22. Suzuki, A. *et al.* Keratinocyte-specific Pten deficiency results in epidermal hyperplasia, accelerated hair follicle morphogenesis and tumor formation. *Cancer Res* **63**, 674-81 (2003).
23. Li, Y. *et al.* Downregulation of PTEN expression in psoriatic lesions. *Int J Dermatol* **53**, 855-60 (2014).
24. Cho, Y.J. & Liang, P. Killin is a p53-regulated nuclear inhibitor of DNA synthesis. *Proc Natl Acad Sci U S A* **105**, 5396-401 (2008).
25. Lawrence, T., Bebien, M., Liu, G.Y., Nizet, V. & Karin, M. IKKalpha limits macrophage NF-kappaB activation and contributes to the resolution of inflammation. *Nature* **434**, 1138-43 (2005).
26. Li, X. *et al.* IKKalpha, IKKbeta, and NEMO/IKKgamma are each required for the NF-kappa B-mediated inflammatory response program. *J Biol Chem* **277**, 45129-40 (2002).
27. Li, Q. *et al.* IKK1-deficient mice exhibit abnormal development of skin and skeleton. *Genes Dev* **13**, 1322-8 (1999).
28. Xu, Y. *et al.* Dendritic cell motility and T cell activation requires regulation of Rho-cofilin signaling by the Rho-GTPase activating protein myosin IXb. *J Immunol* **192**, 3559-68 (2014).
29. Samstag, Y., John, I. & Wabnitz, G.H. Cofilin: a redox sensitive mediator of actin dynamics during T-cell activation and migration. *Immunol Rev* **256**, 30-47 (2013).
30. Kolpakova, E., Frengen, E., Stokke, T. & Olsnes, S. Organization, chromosomal localization and promoter analysis of the gene encoding human acidic fibroblast growth factor intracellular binding protein. *Biochem J* **352 Pt 3**, 629-35 (2000).
31. Evellin, S. *et al.* FOSL1 controls the assembly of endothelial cells into capillary tubes by direct repression of alphaV and beta3 integrin transcription. *Mol Cell Biol* **33**, 1198-209 (2013).
32. Zou, Y. & Stastny, P. Role of MICA in the immune response to transplants. *Tissue Antigens* **76**, 171-6 (2010).
33. Kim, D.K. *et al.* Human NKG2F is expressed and can associate with DAP12. *Mol Immunol* **41**, 53-62 (2004).
34. Asada, M. *et al.* Brap2 functions as a cytoplasmic retention protein for p21 during monocyte differentiation. *Mol Cell Biol* **24**, 8236-43 (2004).
35. New, L. *et al.* PRAK, a novel protein kinase regulated by the p38 MAP kinase. *EMBO J* **17**, 3372-84 (1998).
36. Lindin, I., Wuxiuer, Y., Ravna, A.W., Moens, U. & Sylte, I. Comparative molecular dynamics simulations of mitogen-activated protein kinase-activated protein kinase 5. *Int J Mol Sci* **15**, 4878-902 (2014).
37. Sonkoly, E. *et al.* IL-31: a new link between T cells and pruritus in atopic skin inflammation. *J Allergy Clin Immunol* **117**, 411-7 (2006).
38. Stott, B. *et al.* Human IL-31 is induced by IL-4 and promotes TH2-driven inflammation. *J Allergy Clin Immunol* **132**, 446-54 e5 (2013).
39. Sawalha, A.H. *et al.* A putative functional variant within the UBAC2 gene is associated with increased risk of Behcet's disease. *Arthritis Rheum* **63**, 3607-12 (2011).
40. Nan, H. *et al.* Genome-wide association study identifies novel alleles associated with risk of cutaneous basal cell carcinoma and squamous cell carcinoma. *Hum Mol Genet* **20**, 3718-24 (2011).
41. Song, A., Chen, Y.F., Thamatrakoln, K., Storm, T.A. & Krensky, A.M. RFLAT-1: a new zinc finger transcription factor that activates RANTES gene expression in T lymphocytes. *Immunity* **10**, 93-103 (1999).
42. Kwon, S.J. *et al.* KLF13 cooperates with c-Maf to regulate IL-4 expression in CD4+ T cells. *J Immunol* **192**, 5703-9 (2014).
43. Ozato, K., Shin, D.M., Chang, T.H. & Morse, H.C., 3rd. TRIM family proteins and their emerging roles in innate immunity. *Nat Rev Immunol* **8**, 849-60 (2008).

44. Spalinger, M.R. *et al.* PTPN2 controls differentiation of CD4 T cells and limits intestinal inflammation and intestinal dysbiosis. *Mucosal Immunol* (2014).
45. Wiede, F., Ziegler, A., Zehn, D. & Tiganis, T. PTPN2 restrains CD8(+) T cell responses after antigen cross-presentation for the maintenance of peripheral tolerance in mice. *J Autoimmun* **53**, 105-14 (2014).
46. Koda, Y., Soejima, M., Wang, B. & Kimura, H. Structure and expression of the gene encoding secretor-type galactoside 2-alpha-L-fucosyltransferase (FUT2). *Eur J Biochem* **246**, 750-5 (1997).
47. McGovern, D.P. *et al.* Fucosyltransferase 2 (FUT2) non-secretor status is associated with Crohn's disease. *Hum Mol Genet* **19**, 3468-76 (2010).
48. Franke, A. *et al.* Genome-wide meta-analysis increases to 71 the number of confirmed Crohn's disease susceptibility loci. *Nat Genet* **42**, 1118-25 (2010).
